# Supplementary material
Source: PubMed Central journal article supplement (PMC9896372)
Supplement: jamaophthalmol-e226142-s001.pdf [file jamaophthalmol-e226142-s001.pdf]

## Supplemental Online Content

Hutton DW, Glassman AR, Liu D, Sun JK; the DRCR Retina Network. Cost effectiveness of aflibercept monotherapy vs bevacizumab first followed by aflibercept if needed for diabetic macular edema. *JAMA Ophthalmol*. Published online February 2, 2023. doi:10.1001/jamaophthalmol.2022.6142

**eFigure 1.** Utility Over Time Using Ranibizumab Monotherapy or Combined With Laser Versus Laser Monotherapy for Diabetic Macular Edema (RESTORE) Utility Mapping Based on the Treated Eye

**eFigure 2.** Tornado Diagram Using Ranibizumab Monotherapy or Combined With Laser Versus Laser Monotherapy for Diabetic Macular Edema Utility Mapping Based on the Treated Eye

**eFigure 3.** Sensitivity to Cost of Treatment Per Dose Using Ranibizumab Monotherapy or Combined With Laser Versus Laser Monotherapy for Diabetic Macular Edema Utility Mapping Based on the Treated Eye

**eFigure 4.** Cost-Effectiveness Acceptability Curves

**eFigure 5.** Cost-Effectiveness Acceptability Curves Using Ranibizumab Monotherapy or Combined With Laser Versus Laser Monotherapy for Diabetic Macular Edema Utility Mapping Based on the Treated Eye

### eReferences

This supplemental material has been provided by the authors to give readers additional information about their work.

**eFigure 1.** Utility Over Time Using Ranibizumab Monotherapy or Combined With Laser Versus Laser Monotherapy for Diabetic Macular Edema (RESTORE) Utility Mapping Based on the Treated Eye

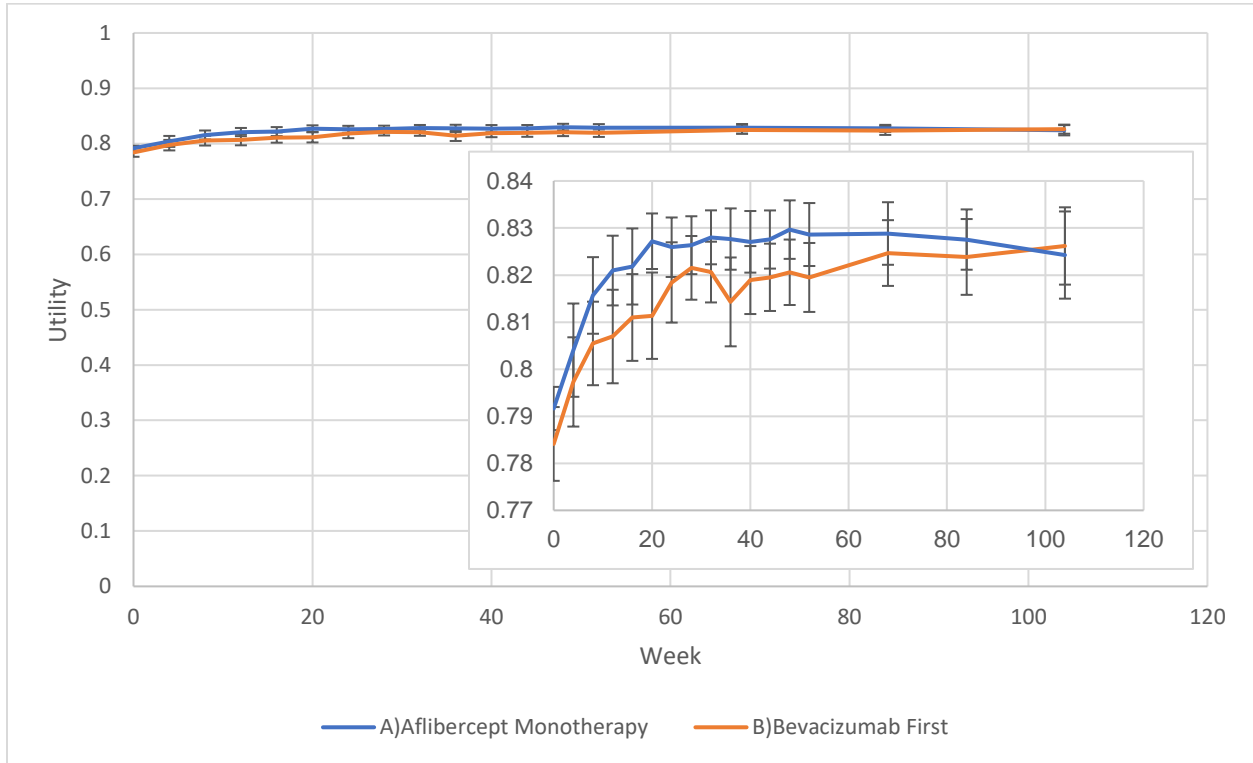

Quality-of-life was mapped to visual acuity letter score in the participant's treated eye at each visit using data from data from the RESTORE trial of anti-VEGF therapy for DME.<sup>1</sup> Error bars represent 95% confidence intervals.

**eFigure 2.** Tornado Diagram Using Ranibizumab Monotherapy or Combined With Laser Versus Laser Monotherapy for Diabetic Macular Edema Utility Mapping Based on the Treated Eye

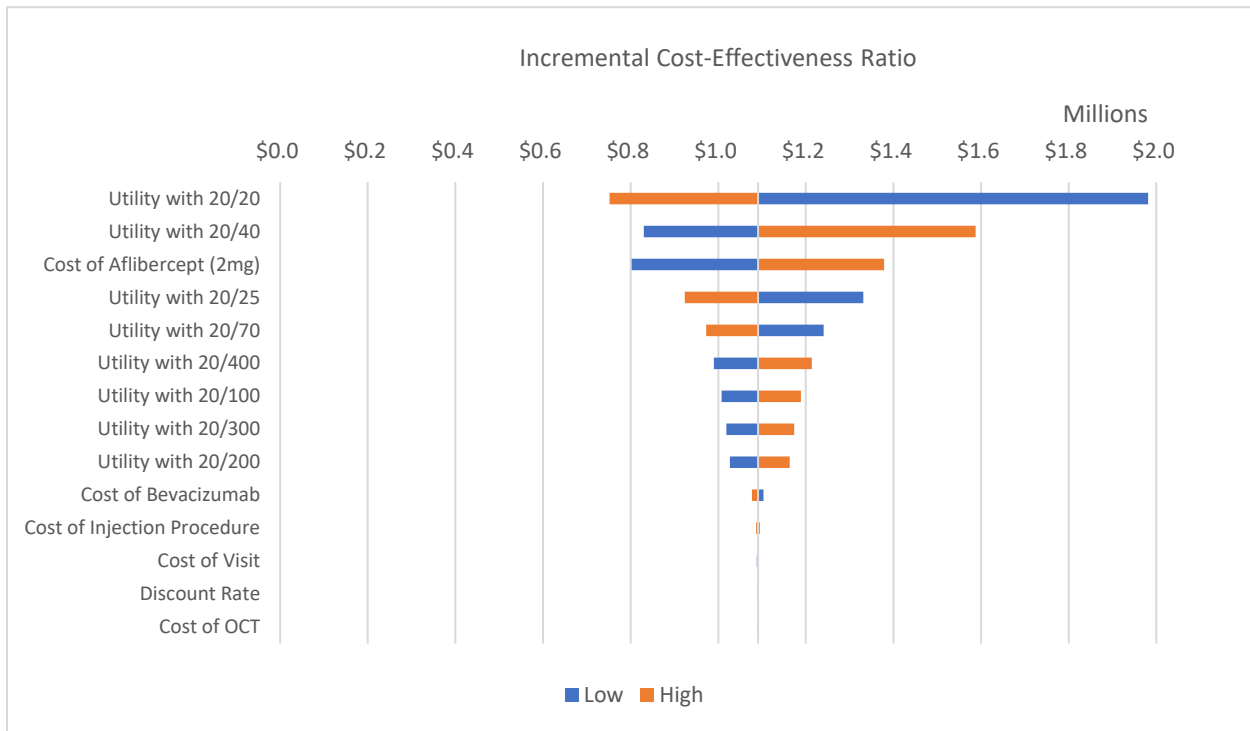

OCT: Optical Coherence Tomography

The tornado diagram shows how the incremental cost-effectiveness ratio on the horizontal axis varies as the individual parameter assumptions (on the vertical axis) vary between the high and low ranges (shown in Table 1).

**eFigure 3.** Sensitivity to Cost of Treatment per Dose Using Ranibizumab Monotherapy or Combined With Laser Versus Laser Monotherapy for Diabetic Macular Edema Utility Mapping Based on the Treated Eye

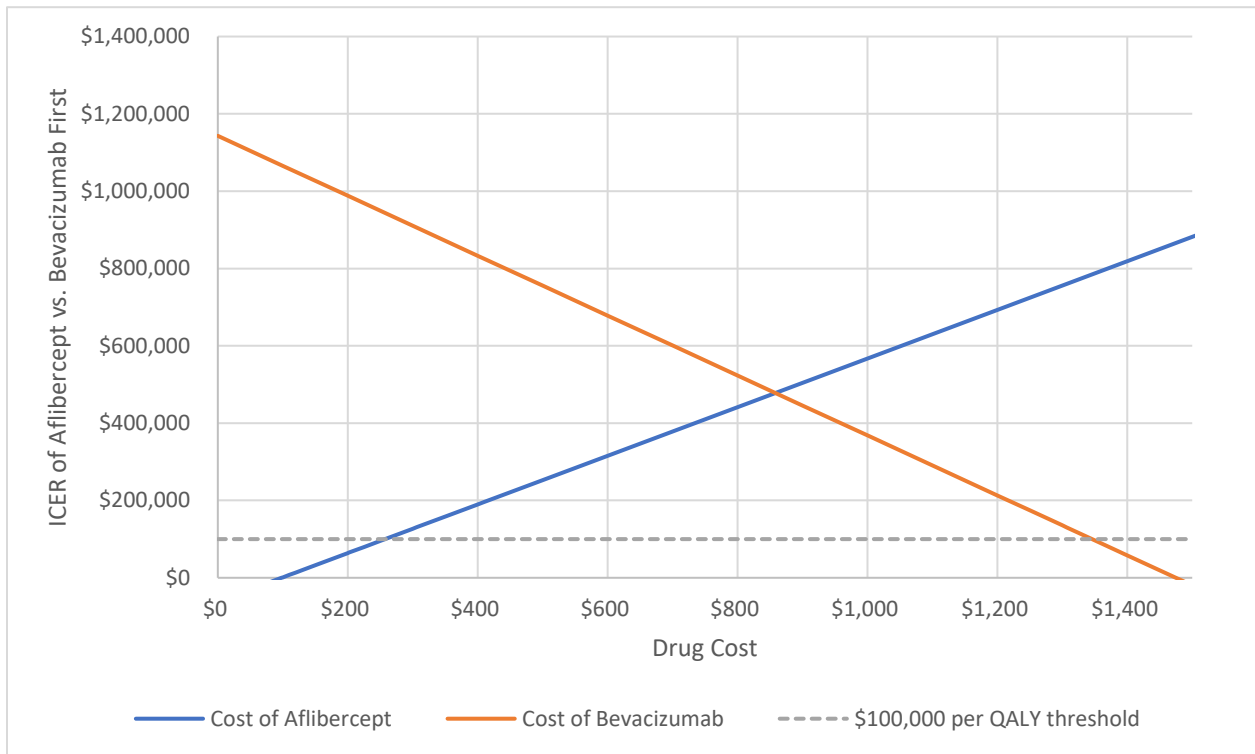

**ICER: Incremental Cost-Effectiveness Ratio**

The lines show the incremental cost-effectiveness ratio (ICER) of aflibercept vs. bevacizumab first (y-axis) at the varying costs of aflibercept and bevacizumab (x-axis). An ICER below \$100,000/QALY is commonly considered meaningful for determining cost-effectiveness in the United States.<sup>2-6</sup>

**eFigure 4. Cost-Effectiveness Acceptability Curves**

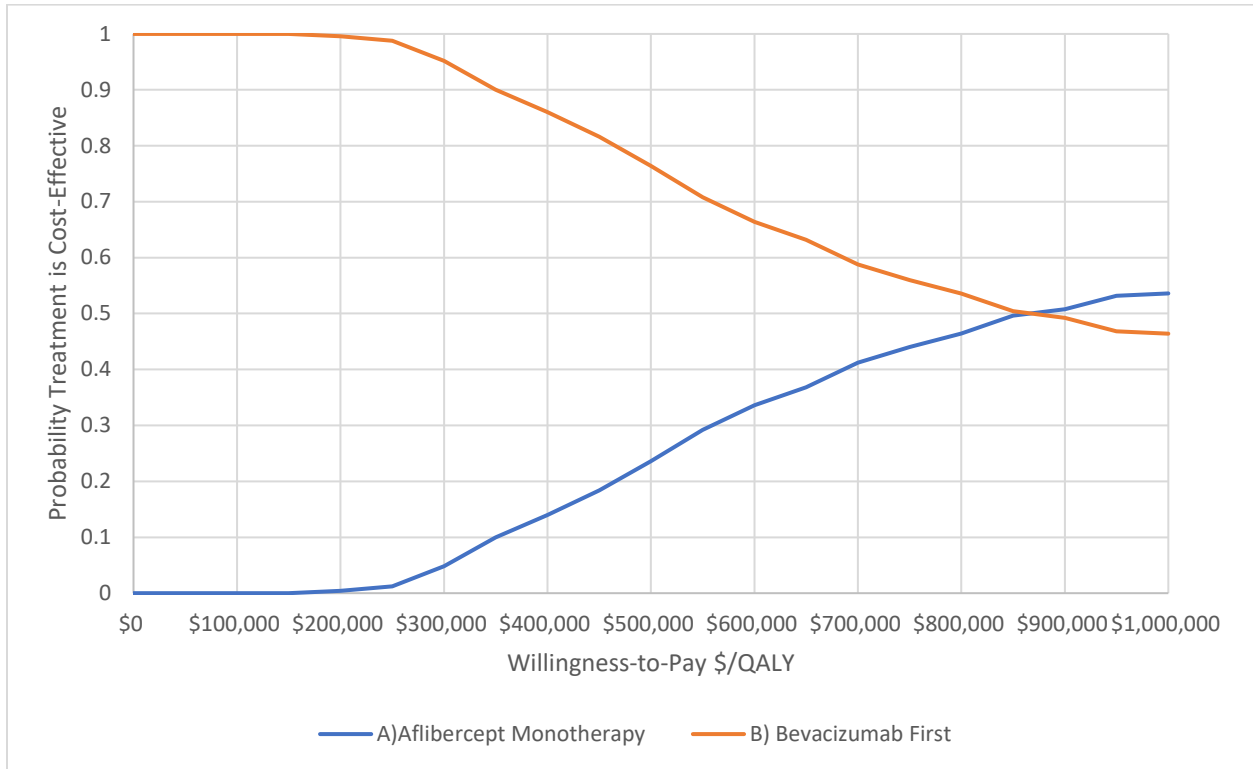

**QALY: Quality-Adjusted Life-Year.**

The curves represent the probability treatment was cost-effective (y-axis) at willingness-to-pay for quality-adjusted life-year (QALY) gains (x-axis). Quality-of-life was mapped to visual acuity letter score in the participant's better-seeing eye at each visit using data from Brown and colleagues.<sup>7</sup>

**eFigure 5.** Cost-Effectiveness Acceptability Curves Using Ranibizumab Monotherapy or Combined With Laser Versus Laser Monotherapy for Diabetic Macular Edema Utility Mapping Based on the Treated Eye

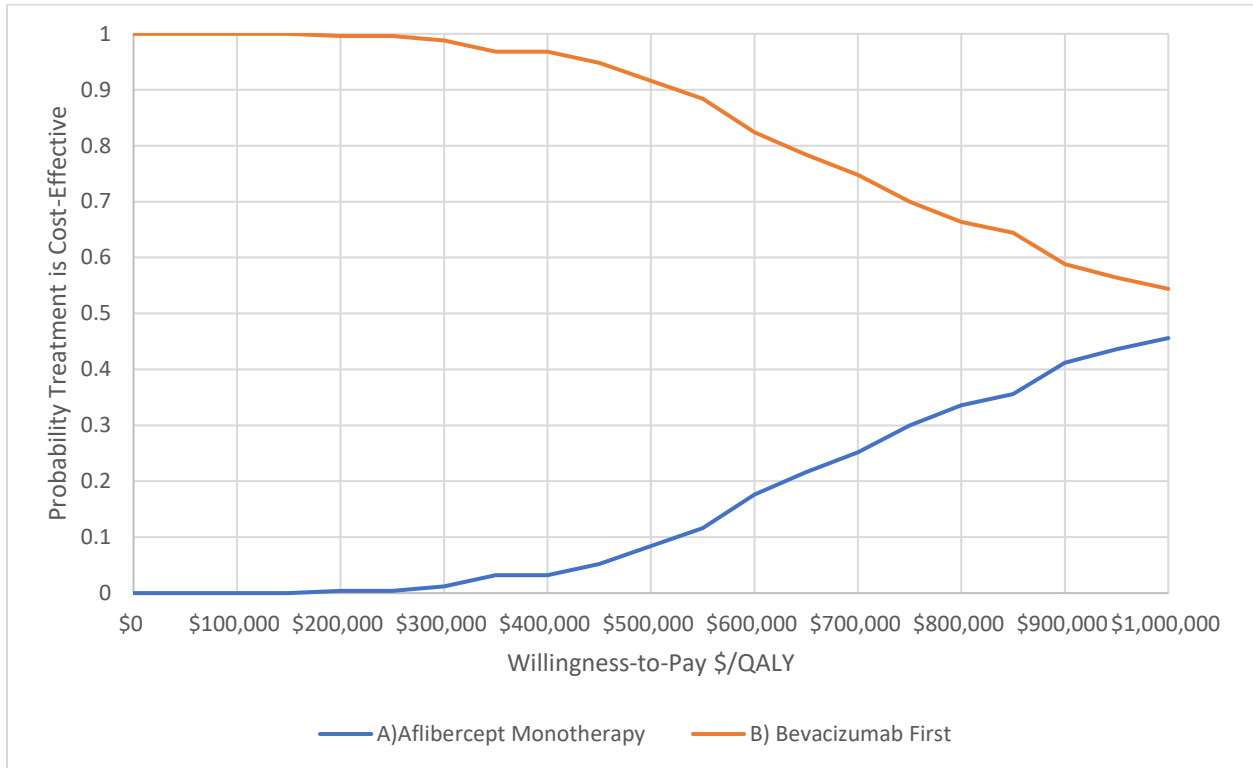

QALY: Quality-Adjusted Life-Year.

The curves represent the probability treatment was cost-effective (y-axis) at willingness-to-pay for quality-adjusted life-year (QALY) gains (x-axis).

## eReferences

1. Mitchell P, Annemans L, Gallagher M, et al. Cost-effectiveness of ranibizumab in treatment of diabetic macular oedema (DME) causing visual impairment: evidence from the RESTORE trial. *Br J Ophthalmol*. 2012;96(5):688-693.
2. Grosse SD. Assessing cost-effectiveness in healthcare: history of the \$50,000 per QALY threshold. *Expert review of pharmacoeconomics & outcomes research*. 2008;8(2):165-178.
3. Anderson JL, Heidenreich PA, Barnett PG, et al. ACC/AHA Statement on Cost/Value Methodology in Clinical Practice Guidelines and Performance MeasuresA Report of the American College of Cardiology/American Heart Association Task Force on Performance Measures and Task Force on Practice Guidelines. *Journal of the American College of Cardiology*. 2014;63(21):2304-2322.
4. Hutton D, Newman-Casey PA, Tavag M, Zacks D, Stein J. Switching to less expensive blindness drug could save medicare part B \$18 billion over a ten-year period. *Health affairs*. 2014;33(6):931-939.
5. Neumann PJ, Cohen JT, Weinstein MC. Updating cost-effectiveness--the curious resilience of the \$50,000-per-QALY threshold. *N Engl J Med*. 2014;371(9):796-797.
6. Ubel PA, Hirth RA, Chernew ME, Fendrick AM. What is the price of life and why doesn't it increase at the rate of inflation? *Arch Intern Med*. 2003;163(14):1637-1641.
7. Brown MM, Brown GC, Sharma S, Landy J. Health care economic analyses and value-based medicine. *Surv Ophthalmol*. 2003;48(2):204-223.
