# Supplementary material
Source: PubMed Central journal article supplement (PMC9896372)
Supplement: jamaophthalmol-e226142-s002.pdf [file jamaophthalmol-e226142-s002.pdf]

\*First name, last name, and suffix (if applicable) are required and will appear in PubMed.

| <b>*Group Name(s): DRCR Retina Network</b> |                   |                              |                  |                                        |                                          |                                                         |                                                                                            |
|--------------------------------------------|-------------------|------------------------------|------------------|----------------------------------------|------------------------------------------|---------------------------------------------------------|--------------------------------------------------------------------------------------------|
| <b>*First Name and Middle Initial(s)</b>   | <b>*Last Name</b> | <b>*Suffix (eg, Jr, III)</b> | Academic Degrees | Institution                            | Location (city, state/province, country) | Role or Contribution, eg, chair, principal investigator | Group (if more than 1 Group listed in the byline) and/or Subgroup (eg, Steering Committee) |
| Mark                                       | Sneath            |                              | COA              | Sarasota Retina Institute              | Sarasota FL US                           | Photographer                                            |                                                                                            |
| Melvin                                     | Chen              |                              | MD               | Sarasota Retina Institute              | Sarasota FL US                           | Investigator                                            |                                                                                            |
| Peggy A.                                   | Jelemensky        |                              |                  | Sarasota Retina Institute              | Sarasota FL US                           | Coordinator                                             |                                                                                            |
| Rosa                                       | Miller            |                              |                  | Sarasota Retina Institute              | Sarasota FL US                           | Photographer                                            |                                                                                            |
| Samantha R.                                | Basham            |                              |                  | Sarasota Retina Institute              | Sarasota FL US                           | VA Tester                                               |                                                                                            |
| Tara L.                                    | Raphael           |                              |                  | Sarasota Retina Institute              | Sarasota FL US                           | VA Tester                                               |                                                                                            |
| Abla M                                     | Harara            |                              |                  | Retina Research Center                 | Austin TX US                             | VA Tester                                               |                                                                                            |
| Brian B.                                   | Berger            |                              | MD               | Retina Research Center                 | Austin TX US                             | Investigator                                            |                                                                                            |
| Chirag D.                                  | Jhaveri           |                              | MD               | Retina Research Center                 | Austin TX US                             | Investigator                                            |                                                                                            |
| Christopher C.                             | Stovall           |                              |                  | Retina Research Center                 | Austin TX US                             | Photographer                                            |                                                                                            |
| Cori                                       | Renfro            |                              |                  | Retina Research Center                 | Austin TX US                             | Coordinator                                             |                                                                                            |
| Daniela                                    | Vega Pereira      |                              |                  | Retina Research Center                 | Austin TX US                             | Coordinator                                             |                                                                                            |
| Daniela Mariel                             | Wilson            |                              |                  | Retina Research Center                 | Austin TX US                             | Coordinator                                             |                                                                                            |
| Fuad                                       | Makkouk           |                              | MD               | Retina Research Center                 | Austin TX US                             | Investigator                                            |                                                                                            |
| Gowtham                                    | Jonna             |                              | MD               | Retina Research Center                 | Austin TX US                             | Investigator                                            |                                                                                            |
| Ivana                                      | Gunderson         |                              |                  | Retina Research Center                 | Austin TX US                             | Coordinator                                             |                                                                                            |
| Saradha                                    | Chexal            |                              | MD               | Retina Research Center                 | Austin TX US                             | Investigator                                            |                                                                                            |
| Valerie                                    | Gatavaski         |                              |                  | Retina Research Center                 | Austin TX US                             | VA Tester                                               |                                                                                            |
| Yong                                       | Ren               |                              |                  | Retina Research Center                 | Austin TX US                             | Photographer                                            |                                                                                            |
| Amber N                                    | Irons             |                              |                  | The Medical College of Wisconsin, Inc. | Milwaukee WI US                          | Photographer                                            |                                                                                            |
| Brittany                                   | Rego              |                              |                  | The Medical College of Wisconsin, Inc. | Milwaukee WI US                          | Photographer                                            |                                                                                            |
| David V.                                   | Weinberg          |                              | M.D.             | The Medical College of Wisconsin, Inc. | Milwaukee WI US                          | Investigator                                            |                                                                                            |
| Eleanor                                    | Dorsey            |                              | BS               | The Medical College of Wisconsin, Inc. | Milwaukee WI US                          | Coordinator                                             |                                                                                            |
| Erika                                      | Nelson            |                              |                  | The Medical College of Wisconsin, Inc. | Milwaukee WI US                          | VA Tester                                               |                                                                                            |

## Supplemental Online Content: Nonauthor Collaborators

\*First name, last name, and suffix (if applicable) are required and will appear in PubMed.

| *First Name and Middle Initial(s) | *Last Name | *Suffix (eg, Jr, III) | Academic Degrees     | Institution                            | Location (city, state/province, country) | Role or Contribution, eg, chair, principal investigator | Group (if more than 1 Group listed in the byline) and/or Subgroup (eg, Steering Committee) |
|-----------------------------------|------------|-----------------------|----------------------|----------------------------------------|------------------------------------------|---------------------------------------------------------|--------------------------------------------------------------------------------------------|
| Hannah                            | Sheppard   |                       |                      | The Medical College of Wisconsin, Inc. | Milwaukee WI US                          | Photographer                                            |                                                                                            |
| Kaitlin C                         | McKenney   |                       | MS                   | The Medical College of Wisconsin, Inc. | Milwaukee WI US                          | Coordinator                                             |                                                                                            |
| Nickolas                          | Chen       |                       |                      | The Medical College of Wisconsin, Inc. | Milwaukee WI US                          | VA Tester                                               |                                                                                            |
| William J.                        | Wirostko   |                       | M.D.                 | The Medical College of Wisconsin, Inc. | Milwaukee WI US                          | Investigator                                            |                                                                                            |
| A. Thomas                         | Ghuman     |                       | MD                   | National Ophthalmic Research Institute | Fort Myers FL US                         | Investigator                                            |                                                                                            |
| Alice                             | Arevalo    |                       |                      | National Ophthalmic Research Institute | Fort Myers FL US                         | VA Tester                                               |                                                                                            |
| Amanda J.                         | Petersen   |                       |                      | National Ophthalmic Research Institute | Fort Myers FL US                         | VA Tester                                               |                                                                                            |
| Anita H.                          | Leslie     |                       |                      | National Ophthalmic Research Institute | Fort Myers FL US                         | VA Tester                                               |                                                                                            |
| Ashish G.                         | Sharma     |                       | MD, F.A.C.S          | National Ophthalmic Research Institute | Fort Myers FL US                         | Investigator                                            |                                                                                            |
| Cheryl                            | Kiesel     |                       | C.O.A., R.O.U.B.     | National Ophthalmic Research Institute | Fort Myers FL US                         | Coordinator                                             |                                                                                            |
| Crystal Y.                        | Peters     |                       | CCRC                 | National Ophthalmic Research Institute | Fort Myers FL US                         | Coordinator                                             |                                                                                            |
| Eileen                            | Knips      |                       | RN, COA, CRA         | National Ophthalmic Research Institute | Fort Myers FL US                         | Coordinator                                             |                                                                                            |
| Joseph P.                         | Walker     |                       | MD                   | National Ophthalmic Research Institute | Fort Myers FL US                         | Investigator                                            |                                                                                            |
| Katrina A.                        | Mears      |                       | MD, MSc, MRCOphthalm | National Ophthalmic Research Institute | Fort Myers FL US                         | Investigator                                            |                                                                                            |
| Kristi                            | Maro       |                       |                      | National Ophthalmic Research Institute | Fort Myers FL US                         | Coordinator                                             |                                                                                            |

Supplemental Online Content: Nonauthor Collaborators

\*First name, last name, and suffix (if applicable) are required and will appear in PubMed.

| *First Name and Middle Initial(s) | *Last Name       | *Suffix (eg, Jr, III) | Academic Degrees | Institution                                 | Location (city, state/province, country) | Role or Contribution, eg, chair, principal investigator | Group (if more than 1 Group listed in the byline) and/or Subgroup (eg, Steering Committee) |
|-----------------------------------|------------------|-----------------------|------------------|---------------------------------------------|------------------------------------------|---------------------------------------------------------|--------------------------------------------------------------------------------------------|
| Lee T                             | Toleman          |                       | COA              | National Ophthalmic Research Institute      | Fort Myers FL US                         | Coordinator                                             |                                                                                            |
| Paul A.                           | Raskauskas       |                       | MD               | National Ophthalmic Research Institute      | Fort Myers FL US                         | Investigator                                            |                                                                                            |
| Raymond K.                        | Kiesel           |                       |                  | National Ophthalmic Research Institute      | Fort Myers FL US                         | Photographer                                            |                                                                                            |
| Ashaki                            | Meeks            |                       |                  | Texas Retina Associates                     | Lubbock TX US                            | VA Tester                                               |                                                                                            |
| Ginger K.                         | Rhymes           |                       | COA              | Texas Retina Associates                     | Lubbock TX US                            | Photographer                                            |                                                                                            |
| Glenn R                           | Gardner          |                       | CRA              | Texas Retina Associates                     | Lubbock TX US                            | Photographer                                            |                                                                                            |
| Michel                            | Shami            |                       | MD               | Texas Retina Associates                     | Lubbock TX US                            | Investigator                                            |                                                                                            |
| Yolanda                           | Saldivar         |                       |                  | Texas Retina Associates                     | Lubbock TX US                            | Coordinator                                             |                                                                                            |
| Deborah K.                        | Schlossman       |                       | MD               | Joslin Diabetes Center                      | Boston MA US                             | Investigator                                            |                                                                                            |
| Elizabeth S.                      | Weimann          |                       | COT, BS          | Joslin Diabetes Center                      | Boston MA US                             | Photographer                                            |                                                                                            |
| Jae W                             | Rhee             |                       |                  | Joslin Diabetes Center                      | Boston MA US                             | Coordinator                                             |                                                                                            |
| Jennifer K.                       | Sun              |                       | MD, MPH          | Joslin Diabetes Center                      | Boston MA US                             | Investigator                                            |                                                                                            |
| Jerry D.                          | Cavallerano      |                       | OD, PhD          | Joslin Diabetes Center                      | Boston MA US                             | VA Tester                                               |                                                                                            |
| Katie V                           | Tran             |                       |                  | Joslin Diabetes Center                      | Boston MA US                             | VA Tester                                               |                                                                                            |
| Leila                             | Bestourous       |                       |                  | Joslin Diabetes Center                      | Boston MA US                             | VA Tester                                               |                                                                                            |
| Margaret E.                       | Stockman         |                       |                  | Joslin Diabetes Center                      | Boston MA US                             | Coordinator                                             |                                                                                            |
| Mina                              | Sehizadeh        |                       | OD               | Joslin Diabetes Center                      | Boston MA US                             | VA Tester                                               |                                                                                            |
| Paolo S.                          | Silva            |                       | MD               | Joslin Diabetes Center                      | Boston MA US                             | Investigator                                            |                                                                                            |
| Robert W.                         | Cavicchi         |                       |                  | Joslin Diabetes Center                      | Boston MA US                             | Photographer                                            |                                                                                            |
| Sabera T.                         | Shah             |                       | MD               | Joslin Diabetes Center                      | Boston MA US                             | Investigator                                            |                                                                                            |
| Steve L.                          | Papaconstantinou |                       | COT              | Joslin Diabetes Center                      | Boston MA US                             | VA Tester                                               |                                                                                            |
| Tanya                             | Olesker          |                       | BS               | Joslin Diabetes Center                      | Boston MA US                             | Coordinator                                             |                                                                                            |
| Timothy J.                        | Murtha           |                       | MD               | Joslin Diabetes Center                      | Boston MA US                             | Investigator                                            |                                                                                            |
| William                           | Carli            |                       | COA              | Joslin Diabetes Center                      | Boston MA US                             | Photographer                                            |                                                                                            |
| Amanda H.                         | Wilson           |                       |                  | Southeast Clinical Research Associates, LLC | Charlotte NC US                          | Coordinator                                             |                                                                                            |

## Supplemental Online Content: Nonauthor Collaborators

\*First name, last name, and suffix (if applicable) are required and will appear in PubMed.

| *First Name and Middle Initial(s) | *Last Name | *Suffix (eg, Jr, III) | Academic Degrees | Institution                                 | Location (city, state/province, country) | Role or Contribution, eg, chair, principal investigator | Group (if more than 1 Group listed in the byline) and/or Subgroup (eg, Steering Committee) |
|-----------------------------------|------------|-----------------------|------------------|---------------------------------------------|------------------------------------------|---------------------------------------------------------|--------------------------------------------------------------------------------------------|
| Andrew N.                         | Antoszyk   |                       | MD               | Southeast Clinical Research Associates, LLC | Charlotte NC US                          | Investigator                                            |                                                                                            |
| Angela K.                         | Price      |                       | MPH              | Southeast Clinical Research Associates, LLC | Charlotte NC US                          | Coordinator                                             |                                                                                            |
| Angella K.                        | Gentile    |                       |                  | Southeast Clinical Research Associates, LLC | Charlotte NC US                          | VA Tester                                               |                                                                                            |
| Brittany A                        | Murphy     |                       | BA, COT          | Southeast Clinical Research Associates, LLC | Charlotte NC US                          | Coordinator                                             |                                                                                            |
| Carol A                           | Shore      |                       |                  | Southeast Clinical Research Associates, LLC | Charlotte NC US                          | Photographer                                            |                                                                                            |
| Christina                         | Mutch      |                       |                  | Southeast Clinical Research Associates, LLC | Charlotte NC US                          | VA Tester                                               |                                                                                            |
| Christina J.                      | Fleming    |                       | BS, CCRP         | Southeast Clinical Research Associates, LLC | Charlotte NC US                          | Coordinator                                             |                                                                                            |
| David                             | Browning   |                       | MD, PhD          | Southeast Clinical Research Associates, LLC | Charlotte NC US                          | Investigator                                            |                                                                                            |
| Donna                             | McClain    |                       | COA              | Southeast Clinical Research Associates, LLC | Charlotte NC US                          | Photographer                                            |                                                                                            |
| John Bradley                      | Allen      |                       | MD               | Southeast Clinical Research Associates, LLC | Charlotte NC US                          | Investigator                                            |                                                                                            |
| Justin                            | Clark      |                       | BS               | Southeast Clinical Research Associates, LLC | Charlotte NC US                          | Coordinator                                             |                                                                                            |
| Kaitlin T.                        | McShea     |                       | MS               | Southeast Clinical Research Associates, LLC | Charlotte NC US                          | VA Tester                                               |                                                                                            |
| Kayla A                           | Bratcher   |                       |                  | Southeast Clinical Research Associates, LLC | Charlotte NC US                          | VA Tester                                               |                                                                                            |
| Lisa A.                           | Jackson    |                       |                  | Southeast Clinical Research Associates, LLC | Charlotte NC US                          | Photographer                                            |                                                                                            |
| Loraine M.                        | Clark      |                       | COA              | Southeast Clinical Research Associates, LLC | Charlotte NC US                          | Photographer                                            |                                                                                            |

## Supplemental Online Content: Nonauthor Collaborators

\*First name, last name, and suffix (if applicable) are required and will appear in PubMed.

| *First Name and Middle Initial(s) | *Last Name      | *Suffix (eg, Jr, III) | Academic Degrees | Institution                                 | Location (city, state/province, country) | Role or Contribution, eg, chair, principal investigator | Group (if more than 1 Group listed in the byline) and/or Subgroup (eg, Steering Committee) |
|-----------------------------------|-----------------|-----------------------|------------------|---------------------------------------------|------------------------------------------|---------------------------------------------------------|--------------------------------------------------------------------------------------------|
| Lynn                              | Watson          |                       |                  | Southeast Clinical Research Associates, LLC | Charlotte NC US                          | Photographer                                            |                                                                                            |
| Monica D.                         | Nayar           |                       | BS               | Southeast Clinical Research Associates, LLC | Charlotte NC US                          | VA Tester                                               |                                                                                            |
| Omar S.                           | Punjabi         |                       | MD               | Southeast Clinical Research Associates, LLC | Charlotte NC US                          | Investigator                                            |                                                                                            |
| Sarah A.                          | Ennis           |                       |                  | Southeast Clinical Research Associates, LLC | Charlotte NC US                          | Coordinator                                             |                                                                                            |
| Shannon                           | Stobbe          |                       |                  | Southeast Clinical Research Associates, LLC | Charlotte NC US                          | Photographer                                            |                                                                                            |
| Sherry L.                         | Fredenberg      |                       |                  | Southeast Clinical Research Associates, LLC | Charlotte NC US                          | Coordinator                                             |                                                                                            |
| Tracy A.                          | Ross            |                       |                  | Southeast Clinical Research Associates, LLC | Charlotte NC US                          | Photographer                                            |                                                                                            |
| Uma M.                            | Balasubramaniam |                       |                  | Southeast Clinical Research Associates, LLC | Charlotte NC US                          | Photographer                                            |                                                                                            |
| Ashley M.                         | Harless         |                       |                  | Raj K. Maturi, M.D., P.C.                   | Indianapolis IN US                       | Coordinator                                             |                                                                                            |
| Carolee K.                        | Novak           |                       | CRC              | Raj K. Maturi, M.D., P.C.                   | Indianapolis IN US                       | VA Tester                                               |                                                                                            |
| Charlotte                         | Harris          |                       |                  | Raj K. Maturi, M.D., P.C.                   | Indianapolis IN US                       | Photographer                                            |                                                                                            |
| Erin                              | Brown           |                       |                  | Raj K. Maturi, M.D., P.C.                   | Indianapolis IN US                       | VA Tester                                               |                                                                                            |
| Holly                             | Fiscus          |                       |                  | Raj K. Maturi, M.D., P.C.                   | Indianapolis IN US                       | Photographer                                            |                                                                                            |
| Lorraine                          | White           |                       |                  | Raj K. Maturi, M.D., P.C.                   | Indianapolis IN US                       | Non-clinical Admin                                      |                                                                                            |
| Myra K                            | Retrum          |                       |                  | Raj K. Maturi, M.D., P.C.                   | Indianapolis IN US                       | VA Tester                                               |                                                                                            |
| Raj K.                            | Maturi          |                       | MD               | Raj K. Maturi, M.D., P.C.                   | Indianapolis IN US                       | Investigator                                            |                                                                                            |
| Stephanie J.                      | Morrow          |                       | C.O.A.           | Raj K. Maturi, M.D., P.C.                   | Indianapolis IN US                       | Photographer                                            |                                                                                            |
| Stephen J                         | Saxe            |                       | MD, F.A.C.S      | Raj K. Maturi, M.D., P.C.                   | Indianapolis IN US                       | Investigator                                            |                                                                                            |
| Vinaya                            | Mahesh          |                       |                  | Raj K. Maturi, M.D., P.C.                   | Indianapolis IN US                       | Coordinator                                             |                                                                                            |
| Yesenia                           | Sarmiento       |                       |                  | Raj K. Maturi, M.D., P.C.                   | Indianapolis IN US                       | Photographer                                            |                                                                                            |
| Caitlin                           | Gilbreath       |                       |                  | Southeastern Retina Associates, P.C.        | Knoxville TN US                          | Photographer                                            |                                                                                            |

## Supplemental Online Content: Nonauthor Collaborators

\*First name, last name, and suffix (if applicable) are required and will appear in PubMed.

| *First Name and Middle Initial(s) | *Last Name | *Suffix (eg, Jr, III) | Academic Degrees | Institution                          | Location (city, state/province, country) | Role or Contribution, eg, chair, principal investigator | Group (if more than 1 Group listed in the byline) and/or Subgroup (eg, Steering Committee) |
|-----------------------------------|------------|-----------------------|------------------|--------------------------------------|------------------------------------------|---------------------------------------------------------|--------------------------------------------------------------------------------------------|
| Hodge A.                          | Griffone   |                       |                  | Southeastern Retina Associates, P.C. | Knoxville TN US                          | Photographer                                            |                                                                                            |
| Jeff                              | Wheeler    |                       |                  | Southeastern Retina Associates, P.C. | Knoxville TN US                          | VA Tester                                               |                                                                                            |
| Joseph M.                         | Googe      | Jr.                   | MD               | Southeastern Retina Associates, P.C. | Knoxville TN US                          | Investigator                                            |                                                                                            |
| Julie                             | Asher      |                       |                  | Southeastern Retina Associates, P.C. | Knoxville TN US                          | Coordinator                                             |                                                                                            |
| Justin                            | Walsh      |                       |                  | Southeastern Retina Associates, P.C. | Knoxville TN US                          | Coordinator                                             |                                                                                            |
| Katie                             | Milstead   |                       |                  | Southeastern Retina Associates, P.C. | Knoxville TN US                          | VA Tester                                               |                                                                                            |
| Kristina                          | Oliver     |                       |                  | Southeastern Retina Associates, P.C. | Knoxville TN US                          | Coordinator                                             |                                                                                            |
| Nicholas G.                       | Anderson   |                       | MD               | Southeastern Retina Associates, P.C. | Knoxville TN US                          | Investigator                                            |                                                                                            |
| R. Keith                          | Shuler     | Jr.                   | MD               | Southeastern Retina Associates, P.C. | Knoxville TN US                          | Investigator                                            |                                                                                            |
| Raul E.                           | Lince      |                       |                  | Southeastern Retina Associates, P.C. | Knoxville TN US                          | Photographer                                            |                                                                                            |
| Sarah M.                          | Oelrich    |                       |                  | Southeastern Retina Associates, P.C. | Knoxville TN US                          | Photographer                                            |                                                                                            |
| Stephen L.                        | Perkins    |                       | MD               | Southeastern Retina Associates, P.C. | Knoxville TN US                          | Investigator                                            |                                                                                            |
| Steve                             | Morris     |                       |                  | Southeastern Retina Associates, P.C. | Knoxville TN US                          | Coordinator                                             |                                                                                            |
| Summer                            | McCoy      |                       |                  | Southeastern Retina Associates, P.C. | Knoxville TN US                          | VA Tester                                               |                                                                                            |
| Vicky L.                          | Seitz      |                       |                  | Southeastern Retina Associates, P.C. | Knoxville TN US                          | Coordinator                                             |                                                                                            |

## Supplemental Online Content: Nonauthor Collaborators

\*First name, last name, and suffix (if applicable) are required and will appear in PubMed.

| *First Name and Middle Initial(s) | *Last Name    | *Suffix (eg, Jr, III) | Academic Degrees | Institution                     | Location (city, state/province, country) | Role or Contribution, eg, chair, principal investigator | Group (if more than 1 Group listed in the byline) and/or Subgroup (eg, Steering Committee) |
|-----------------------------------|---------------|-----------------------|------------------|---------------------------------|------------------------------------------|---------------------------------------------------------|--------------------------------------------------------------------------------------------|
| Ahmad                             | Al Moshmash   |                       |                  | Case Western Reserve University | CLEVELAND OH US                          | Photographer                                            |                                                                                            |
| Ashley M                          | Nicholson     |                       |                  | Case Western Reserve University | CLEVELAND OH US                          | Photographer                                            |                                                                                            |
| Ashley Y                          | Tucker        |                       |                  | Case Western Reserve University | CLEVELAND OH US                          | Photographer                                            |                                                                                            |
| Claudia                           | Clow          |                       |                  | Case Western Reserve University | CLEVELAND OH US                          | VA Tester                                               |                                                                                            |
| Georgios                          | Trichonas     |                       | MD               | Case Western Reserve University | CLEVELAND OH US                          | Investigator                                            |                                                                                            |
| Geraldo R                         | Miranda       |                       |                  | Case Western Reserve University | CLEVELAND OH US                          | Photographer                                            |                                                                                            |
| Irit                              | Baum-Rawraway |                       |                  | Case Western Reserve University | CLEVELAND OH US                          | Photographer                                            |                                                                                            |
| Jasmeen K                         | Randhawa      |                       |                  | Case Western Reserve University | CLEVELAND OH US                          | Coordinator                                             |                                                                                            |
| Jennifer                          | O'Malley      |                       |                  | Case Western Reserve University | CLEVELAND OH US                          | VA Tester                                               |                                                                                            |
| Laura M                           | Wash          |                       |                  | Case Western Reserve University | CLEVELAND OH US                          | VA Tester                                               |                                                                                            |
| Leslie A                          | Richards      |                       |                  | Case Western Reserve University | CLEVELAND OH US                          | Coordinator                                             |                                                                                            |
| Margaret N                        | Petrosky      |                       |                  | Case Western Reserve University | CLEVELAND OH US                          | VA Tester                                               |                                                                                            |
| Peggy                             | Allchin       |                       |                  | Case Western Reserve University | CLEVELAND OH US                          | VA Tester                                               |                                                                                            |
| Shree K.                          | Kurup         |                       | MD               | Case Western Reserve University | CLEVELAND OH US                          | Investigator                                            |                                                                                            |
| Stephanie                         | Pelton        |                       |                  | Case Western Reserve University | CLEVELAND OH US                          | Photographer                                            |                                                                                            |
| Alisha N                          | Brewer        |                       | BA               | Dean A. McGee Eye Institute     | Oklahoma City OK US                      | Coordinator                                             |                                                                                            |

## Supplemental Online Content: Nonauthor Collaborators

\*First name, last name, and suffix (if applicable) are required and will appear in PubMed.

| *First Name and Middle Initial(s) | *Last Name   | *Suffix (eg, Jr, III) | Academic Degrees | Institution                  | Location (city, state/province, country) | Role or Contribution, eg, chair, principal investigator | Group (if more than 1 Group listed in the byline) and/or Subgroup (eg, Steering Committee) |
|-----------------------------------|--------------|-----------------------|------------------|------------------------------|------------------------------------------|---------------------------------------------------------|--------------------------------------------------------------------------------------------|
| Amanda M                          | Hollingshead |                       | CRA              | Dean A. McGee Eye Institute  | Oklahoma City OK US                      | Photographer                                            |                                                                                            |
| Ashley                            | Hughes       |                       |                  | Dean A. McGee Eye Institute  | Oklahoma City OK US                      | VA Tester                                               |                                                                                            |
| Markeisha                         | Cheadle      |                       |                  | Dean A. McGee Eye Institute  | Oklahoma City OK US                      | Coordinator                                             |                                                                                            |
| Myka                              | Thomas       |                       |                  | Dean A. McGee Eye Institute  | Oklahoma City OK US                      | Coordinator                                             |                                                                                            |
| Rachel                            | Sohl         |                       |                  | Dean A. McGee Eye Institute  | Oklahoma City OK US                      | Photographer                                            |                                                                                            |
| Ronald M.                         | Kingsley     |                       | MD               | Dean A. McGee Eye Institute  | Oklahoma City OK US                      | Investigator                                            |                                                                                            |
| Russ                              | Burris       |                       |                  | Dean A. McGee Eye Institute  | Oklahoma City OK US                      | Photographer                                            |                                                                                            |
| Shannon R.                        | Almeida      |                       |                  | Dean A. McGee Eye Institute  | Oklahoma City OK US                      | Coordinator                                             |                                                                                            |
| Sonny                             | Icks         |                       | COA, CCRC        | Dean A. McGee Eye Institute  | Oklahoma City OK US                      | Coordinator                                             |                                                                                            |
| Vinay A.                          | Shah         |                       | MD               | Dean A. McGee Eye Institute  | Oklahoma City OK US                      | Investigator                                            |                                                                                            |
| Alecia B.                         | Camp         |                       |                  | The Ophthalmology Group, LLC | PADUCAH KY US                            | Photographer                                            |                                                                                            |
| Carl W.                           | Baker        |                       | MD               | The Ophthalmology Group, LLC | PADUCAH KY US                            | Investigator                                            |                                                                                            |
| Jil D                             | Baker        |                       | MT, ASCP         | The Ophthalmology Group, LLC | PADUCAH KY US                            | Coordinator                                             |                                                                                            |
| Kylie S.                          | Sedberry     |                       |                  | The Ophthalmology Group, LLC | PADUCAH KY US                            | Photographer                                            |                                                                                            |
| Margaret J.                       | Orr          |                       | COA              | The Ophthalmology Group, LLC | PADUCAH KY US                            | VA Tester                                               |                                                                                            |
| Mary J.                           | Sharp        |                       | COA              | The Ophthalmology Group, LLC | PADUCAH KY US                            | VA Tester                                               |                                                                                            |
| Samantha                          | Kettler      |                       |                  | The Ophthalmology Group, LLC | PADUCAH KY US                            | Photographer                                            |                                                                                            |
| Sonya L                           | Alcaraz      |                       |                  | The Ophthalmology Group, LLC | PADUCAH KY US                            | Photographer                                            |                                                                                            |
| Tracey M.                         | Caldwell     |                       | CCRC             | The Ophthalmology Group, LLC | PADUCAH KY US                            | Coordinator                                             |                                                                                            |
| Angela D.                         | Listerman    |                       | BS               | Vitreo-Retinal Associates    | Grand Rapids MI US                       | Coordinator                                             |                                                                                            |
| Ashley L                          | Igoe         |                       |                  | Vitreo-Retinal Associates    | Grand Rapids MI US                       | Coordinator                                             |                                                                                            |
| Christine E.                      | Feehan       |                       |                  | Vitreo-Retinal Associates    | Grand Rapids MI US                       | VA Tester                                               |                                                                                            |
| Darra S.                          | McLouth      |                       |                  | Vitreo-Retinal Associates    | Grand Rapids MI US                       | VA Tester                                               |                                                                                            |
| Donald E.                         | Kuitula      |                       | BS               | Vitreo-Retinal Associates    | Grand Rapids MI US                       | Photographer                                            |                                                                                            |
| Elizabeth                         | Truax        |                       |                  | Vitreo-Retinal Associates    | Grand Rapids MI US                       | Photographer                                            |                                                                                            |
| Frank W.                          | Garber       |                       | MD               | Vitreo-Retinal Associates    | Grand Rapids MI US                       | Investigator                                            |                                                                                            |
| Heather L.                        | Cruz         |                       | AAS              | Vitreo-Retinal Associates    | Grand Rapids MI US                       | VA Tester                                               |                                                                                            |
| Jeffrey D.                        | Zheutlin     |                       | MD               | Vitreo-Retinal Associates    | Grand Rapids MI US                       | Investigator                                            |                                                                                            |
| Kathleen U.                       | DeHorn       |                       | MD               | Vitreo-Retinal Associates    | Grand Rapids MI US                       | Investigator                                            |                                                                                            |



Supplemental Online Content: Nonauthor Collaborators

\*First name, last name, and suffix (if applicable) are required and will appear in PubMed.

| *First Name and Middle Initial(s) | *Last Name | *Suffix (eg, Jr, III) | Academic Degrees | Institution                     | Location (city, state/province, country) | Role or Contribution, eg, chair, principal investigator | Group (if more than 1 Group listed in the byline) and/or Subgroup (eg, Steering Committee) |
|-----------------------------------|------------|-----------------------|------------------|---------------------------------|------------------------------------------|---------------------------------------------------------|--------------------------------------------------------------------------------------------|
| Louis C.                          | Glazer     |                       | MD, FACS         | Vitreo-Retinal Associates       | Grand Rapids MI US                       | Investigator                                            |                                                                                            |
| Melissa A.                        | Homann     |                       | BS               | Vitreo-Retinal Associates       | Grand Rapids MI US                       | Coordinator                                             |                                                                                            |
| Paul D.                           | Crown      |                       |                  | Vitreo-Retinal Associates       | Grand Rapids MI US                       | Photographer                                            |                                                                                            |
| Sue                               | Weatherbee |                       | AAS              | Vitreo-Retinal Associates       | Grand Rapids MI US                       | Photographer                                            |                                                                                            |
| Amy                               | Hutson     |                       |                  | Retina Consultants of Texas, PA | Bellaire TX US                           | Coordinator                                             |                                                                                            |
| Beau A                            | Richter    |                       |                  | Retina Consultants of Texas, PA | Bellaire TX US                           | Photographer                                            |                                                                                            |
| Belinda A.                        | Almanza    |                       |                  | Retina Consultants of Texas, PA | Bellaire TX US                           | VA Tester                                               |                                                                                            |
| Charles C.                        | Wykoff     |                       | MD, PhD          | Retina Consultants of Texas, PA | Bellaire TX US                           | Investigator                                            |                                                                                            |
| Christopher R.                    | Henry      |                       | MD               | Retina Consultants of Texas, PA | Bellaire TX US                           | Investigator                                            |                                                                                            |
| David                             | Garcia     |                       |                  | Retina Consultants of Texas, PA | Bellaire TX US                           | Photographer                                            |                                                                                            |
| Eric N.                           | Kegley     |                       |                  | Retina Consultants of Texas, PA | Bellaire TX US                           | Photographer                                            |                                                                                            |
| Melina                            | Vela       |                       |                  | Retina Consultants of Texas, PA | Bellaire TX US                           | VA Tester                                               |                                                                                            |
| Richard H.                        | Fish       |                       | MD, FACS         | Retina Consultants of Texas, PA | Bellaire TX US                           | Investigator                                            |                                                                                            |
| Tyneisha                          | McCoy      |                       |                  | Retina Consultants of Texas, PA | Bellaire TX US                           | Coordinator                                             |                                                                                            |
| Veronica A.                       | Sneed      |                       |                  | Retina Consultants of Texas, PA | Bellaire TX US                           | VA Tester                                               |                                                                                            |
| Adel E                            | Alset      |                       | COA              | Loma Linda University           | Loma Linda CA US                         | Photographer                                            |                                                                                            |
| David Isaiah                      | Sierpina   |                       | MD               | Loma Linda University           | Loma Linda CA US                         | Investigator                                            |                                                                                            |
| Marcia                            | Easterly   |                       |                  | Loma Linda University           | Loma Linda CA US                         | Coordinator                                             |                                                                                            |
| Michael E.                        | Rausser    |                       | MD               | Loma Linda University           | Loma Linda CA US                         | Investigator                                            |                                                                                            |
| Moises                            | Tellez     |                       |                  | Loma Linda University           | Loma Linda CA US                         | Photographer                                            |                                                                                            |
| Raquel                            | Hernandez  |                       |                  | Loma Linda University           | Loma Linda CA US                         | Coordinator                                             |                                                                                            |
| Tina L                            | Ramirez    |                       |                  | Loma Linda University           | Loma Linda CA US                         | Coordinator                                             |                                                                                            |
| Ashok K.                          | Reddy      |                       | MD               | Eye Associates of New Mexico    | ALBUQUERQUE NM US                        | Investigator                                            |                                                                                            |
| Bonnie J                          | Gutierrez  |                       |                  | Eye Associates of New Mexico    | ALBUQUERQUE NM US                        | Coordinator                                             |                                                                                            |
| Janet L                           | Atkinson   |                       |                  | Eye Associates of New Mexico    | ALBUQUERQUE NM US                        | Photographer                                            |                                                                                            |
| Kamalesh J.                       | Ramaiya    |                       | MD               | Eye Associates of New Mexico    | ALBUQUERQUE NM US                        | Investigator                                            |                                                                                            |
| Lorraine J.                       | Carter     |                       | MPH              | Eye Associates of New Mexico    | ALBUQUERQUE NM US                        | VA Tester                                               |                                                                                            |
| Mark T.                           | Chiu       |                       | MD               | Eye Associates of New Mexico    | ALBUQUERQUE NM US                        | Investigator                                            |                                                                                            |
| Marlena A                         | Daniels    |                       |                  | Eye Associates of New Mexico    | ALBUQUERQUE NM US                        | Coordinator                                             |                                                                                            |

Supplemental Online Content: Nonauthor Collaborators

\*First name, last name, and suffix (if applicable) are required and will appear in PubMed.

| *First Name and Middle Initial(s) | *Last Name | *Suffix (eg, Jr, III) | Academic Degrees | Institution                             | Location (city, state/province, country) | Role or Contribution, eg, chair, principal investigator | Group (if more than 1 Group listed in the byline) and/or Subgroup (eg, Steering Committee) |
|-----------------------------------|------------|-----------------------|------------------|-----------------------------------------|------------------------------------------|---------------------------------------------------------|--------------------------------------------------------------------------------------------|
| Michael G                         | Miera      |                       | BS               | Eye Associates of New Mexico            | ALBUQUERQUE NM US                        | Photographer                                            |                                                                                            |
| Shirley                           | Maerki     |                       | COA              | Eye Associates of New Mexico            | ALBUQUERQUE NM US                        | VA Tester                                               |                                                                                            |
| Debra Paige                       | Bunch      |                       | COA              | John Kenyon American Eye Institute, LLC | New Albany IN US                         | Coordinator                                             |                                                                                            |
| Howard S.                         | Lazarus    |                       | MD               | John Kenyon American Eye Institute, LLC | New Albany IN US                         | Investigator                                            |                                                                                            |
| Jay                               | Moore      |                       | COA              | John Kenyon American Eye Institute, LLC | New Albany IN US                         | Photographer                                            |                                                                                            |
| Liana C.                          | Davis      |                       | LPN, COA         | John Kenyon American Eye Institute, LLC | New Albany IN US                         | Coordinator                                             |                                                                                            |
| Nick                              | Drudge     |                       |                  | John Kenyon American Eye Institute, LLC | New Albany IN US                         | Photographer                                            |                                                                                            |
| Brenda J.                         | Bobbitt    |                       |                  | Florida Retina Consultants              | Lakeland FL US                           | Photographer                                            |                                                                                            |
| Ceara L                           | Wendel     |                       |                  | Florida Retina Consultants              | Lakeland FL US                           | Coordinator                                             |                                                                                            |
| Damanda F.                        | Fagan      |                       |                  | Florida Retina Consultants              | Lakeland FL US                           | Coordinator                                             |                                                                                            |
| Jacqueline                        | Andrews    |                       |                  | Florida Retina Consultants              | Lakeland FL US                           | VA Tester                                               |                                                                                            |
| Karen L                           | Seyez      |                       | COT              | Florida Retina Consultants              | Lakeland FL US                           | VA Tester                                               |                                                                                            |
| Krystal Nikki                     | Holmes     |                       |                  | Florida Retina Consultants              | Lakeland FL US                           | Photographer                                            |                                                                                            |
| Lauren                            | Cadieux    |                       |                  | Florida Retina Consultants              | Lakeland FL US                           | VA Tester                                               |                                                                                            |
| Nader                             | Moinfar    |                       | MD, MPH          | Florida Retina Consultants              | Lakeland FL US                           | Investigator                                            |                                                                                            |
| Scott M.                          | Friedman   |                       | MD               | Florida Retina Consultants              | Lakeland FL US                           | Investigator                                            |                                                                                            |
| Shana E                           | Williams   |                       |                  | Florida Retina Consultants              | Lakeland FL US                           | Photographer                                            |                                                                                            |
| Shannon M                         | Rehling    |                       |                  | Florida Retina Consultants              | Lakeland FL US                           | Coordinator                                             |                                                                                            |
| Tammi                             | Marsh      |                       |                  | Florida Retina Consultants              | Lakeland FL US                           | Coordinator                                             |                                                                                            |
| Amber R                           | VandeVelde |                       | RN               | Retina Associates, P.A.                 | Lenexa KS US                             | VA Tester                                               |                                                                                            |
| Beatty G.                         | Suiter     |                       | MD               | Retina Associates, P.A.                 | Lenexa KS US                             | Investigator                                            |                                                                                            |
| Blake A.                          | Cooper     |                       | MD               | Retina Associates, P.A.                 | Lenexa KS US                             | Investigator                                            |                                                                                            |
| Frank T.                          | Yeager     |                       |                  | Retina Associates, P.A.                 | Lenexa KS US                             | Photographer                                            |                                                                                            |
| Gregory M.                        | Fox        |                       | MD               | Retina Associates, P.A.                 | Lenexa KS US                             | Investigator                                            |                                                                                            |
| Holly                             | Wyrick     |                       |                  | Retina Associates, P.A.                 | Lenexa KS US                             | VA Tester                                               |                                                                                            |
| Holly A                           | Hinkel     |                       |                  | Retina Associates, P.A.                 | Lenexa KS US                             | VA Tester                                               |                                                                                            |

Supplemental Online Content: Nonauthor Collaborators

\*First name, last name, and suffix (if applicable) are required and will appear in PubMed.

| *First Name and Middle Initial(s) | *Last Name  | *Suffix (eg, Jr, III) | Academic Degrees | Institution                    | Location (city, state/province, country) | Role or Contribution, eg, chair, principal investigator | Group (if more than 1 Group listed in the byline) and/or Subgroup (eg, Steering Committee) |
|-----------------------------------|-------------|-----------------------|------------------|--------------------------------|------------------------------------------|---------------------------------------------------------|--------------------------------------------------------------------------------------------|
| Ivan R.                           | Battle      |                       | MD               | Retina Associates, P.A.        | Lenexa KS US                             | Investigator                                            |                                                                                            |
| Katherine                         | Pippin      |                       |                  | Retina Associates, P.A.        | Lenexa KS US                             | Photographer                                            |                                                                                            |
| Lexie R.                          | Ainley      |                       |                  | Retina Associates, P.A.        | Lenexa KS US                             | Coordinator                                             |                                                                                            |
| Ravi S. J.                        | Singh       |                       | MD               | Retina Associates, P.A.        | Lenexa KS US                             | Investigator                                            |                                                                                            |
| Samantha                          | Perkins     |                       |                  | Retina Associates, P.A.        | Lenexa KS US                             | Photographer                                            |                                                                                            |
| Adrian                            | Guardado    |                       |                  | Retina Northwest, PC           | Portland OR US                           | Photographer                                            |                                                                                            |
| Apurva K.                         | Patel       |                       | MD               | Retina Northwest, PC           | Portland OR US                           | Investigator                                            |                                                                                            |
| Ashley M                          | Adamo       |                       |                  | Retina Northwest, PC           | Portland OR US                           | Coordinator                                             |                                                                                            |
| Brian S                           | Puckett     |                       |                  | Retina Northwest, PC           | Portland OR US                           | Coordinator                                             |                                                                                            |
| David J                           | Clark       |                       |                  | Retina Northwest, PC           | Portland OR US                           | VA Tester                                               |                                                                                            |
| Inessa M                          | Flato       |                       |                  | Retina Northwest, PC           | Portland OR US                           | VA Tester                                               |                                                                                            |
| Joshua                            | Cohen       |                       |                  | Retina Northwest, PC           | Portland OR US                           | Photographer                                            |                                                                                            |
| Marcia                            | Kopfer      |                       | BS, COT          | Retina Northwest, PC           | Portland OR US                           | VA Tester                                               |                                                                                            |
| Megan M                           | Cleary      |                       | BS/BA            | Retina Northwest, PC           | Portland OR US                           | Coordinator                                             |                                                                                            |
| Michael S.                        | Lee         |                       | MD               | Retina Northwest, PC           | Portland OR US                           | Investigator                                            |                                                                                            |
| Michele                           | Connaughton |                       |                  | Retina Northwest, PC           | Portland OR US                           | Photographer                                            |                                                                                            |
| Paul S.                           | Tlucek      |                       | MD               | Retina Northwest, PC           | Portland OR US                           | Investigator                                            |                                                                                            |
| Wenlan                            | Zhang       |                       | MD               | Retina Northwest, PC           | Portland OR US                           | Investigator                                            |                                                                                            |
| Alia K.                           | Durrani     |                       | MD               | Retina Research Institute, LLC | St. Louis MO US                          | Investigator                                            |                                                                                            |
| Allan L.                          | Braverman   |                       | BS               | Retina Research Institute, LLC | St. Louis MO US                          | Coordinator                                             |                                                                                            |
| Brook G.                          | Pulliam     |                       | COA              | Retina Research Institute, LLC | St. Louis MO US                          | VA Tester                                               |                                                                                            |
| Dana L                            | Gabel       |                       |                  | Retina Research Institute, LLC | St. Louis MO US                          | Photographer                                            |                                                                                            |
| Diana                             | Reardon     |                       | RNA              | Retina Research Institute, LLC | St. Louis MO US                          | VA Tester                                               |                                                                                            |
| Ginny S.                          | Nobel       |                       | COT              | Retina Research Institute, LLC | St. Louis MO US                          | Coordinator                                             |                                                                                            |
| Jarrold                           | Wehmeier    |                       |                  | Retina Research Institute, LLC | St. Louis MO US                          | Photographer                                            |                                                                                            |
| Kara R                            | Bockius     |                       |                  | Retina Research Institute, LLC | St. Louis MO US                          | Coordinator                                             |                                                                                            |
| Kevin J.                          | Blinder     |                       | MD               | Retina Research Institute, LLC | St. Louis MO US                          | Investigator                                            |                                                                                            |
| Lynda K.                          | Boyd        |                       | C.O.T.           | Retina Research Institute, LLC | St. Louis MO US                          | VA Tester                                               |                                                                                            |
| Maria A.                          | Stuart      |                       | COA              | Retina Research Institute, LLC | St. Louis MO US                          | VA Tester                                               |                                                                                            |
| Nathan A.                         | Kittleman   |                       | BA               | Retina Research Institute, LLC | St. Louis MO US                          | Photographer                                            |                                                                                            |
| Rhonda F.                         | Weeks       |                       | CCRC             | Retina Research Institute, LLC | St. Louis MO US                          | Coordinator                                             |                                                                                            |

Supplemental Online Content: Nonauthor Collaborators

\*First name, last name, and suffix (if applicable) are required and will appear in PubMed.

| *First Name and Middle Initial(s) | *Last Name | *Suffix (eg, Jr, III) | Academic Degrees | Institution                          | Location (city, state/province, country) | Role or Contribution, eg, chair, principal investigator | Group (if more than 1 Group listed in the byline) and/or Subgroup (eg, Steering Committee) |
|-----------------------------------|------------|-----------------------|------------------|--------------------------------------|------------------------------------------|---------------------------------------------------------|--------------------------------------------------------------------------------------------|
| Sabin                             | Dang       |                       | MD               | Retina Research Institute, LLC       | St. Louis MO US                          | Investigator                                            |                                                                                            |
| Steve A                           | Schremp    |                       |                  | Retina Research Institute, LLC       | St. Louis MO US                          | Photographer                                            |                                                                                            |
| Amber B                           | Ibarra     |                       | BS               | Valley Retina Institute              | McAllen TX US                            | Coordinator                                             |                                                                                            |
| Ana L                             | Pina       |                       | B.A.             | Valley Retina Institute              | McAllen TX US                            | Coordinator                                             |                                                                                            |
| Angelina                          | Garza      | Mrs.                  | B.S.             | Valley Retina Institute              | McAllen TX US                            | Coordinator                                             |                                                                                            |
| Elyssa                            | Navarro    |                       |                  | Valley Retina Institute              | McAllen TX US                            | Coordinator                                             |                                                                                            |
| Georgia L.                        | Villarreal |                       |                  | Valley Retina Institute              | McAllen TX US                            | Photographer                                            |                                                                                            |
| Isaac                             | Cabrera    |                       |                  | Valley Retina Institute              | McAllen TX US                            | VA Tester                                               |                                                                                            |
| Nancy L                           | Salinas    |                       |                  | Valley Retina Institute              | McAllen TX US                            | Coordinator                                             |                                                                                            |
| Nehal R.                          | Patel      |                       | MD               | Valley Retina Institute              | McAllen TX US                            | Investigator                                            |                                                                                            |
| Rebecca R.                        | Flores     |                       | COA              | Valley Retina Institute              | McAllen TX US                            | VA Tester                                               |                                                                                            |
| Samuel                            | Alonso     |                       |                  | Valley Retina Institute              | McAllen TX US                            | Photographer                                            |                                                                                            |
| Santos                            | Garza      |                       |                  | Valley Retina Institute              | McAllen TX US                            | Photographer                                            |                                                                                            |
| Victor Hugo                       | Gonzalez   |                       | MD               | Valley Retina Institute              | McAllen TX US                            | Investigator                                            |                                                                                            |
| Dennis M.                         | Marcus     |                       | MD               | Southeast Retina Center, P.C.        | Augusta GA US                            | Investigator                                            |                                                                                            |
| Elizabeth W                       | Simons     |                       |                  | Southeast Retina Center, P.C.        | Augusta GA US                            | Coordinator                                             |                                                                                            |
| Ken                               | Ivey       |                       | COA              | Southeast Retina Center, P.C.        | Augusta GA US                            | Photographer                                            |                                                                                            |
| Michele                           | Woodward   |                       |                  | Southeast Retina Center, P.C.        | Augusta GA US                            | VA Tester                                               |                                                                                            |
| Siobhan O.                        | Ortiz      |                       |                  | Southeast Retina Center, P.C.        | Augusta GA US                            | Coordinator                                             |                                                                                            |
| Thomas                            | Bailey     |                       |                  | Southeast Retina Center, P.C.        | Augusta GA US                            | VA Tester                                               |                                                                                            |
| Courtney J                        | Dunn       |                       |                  | Mid-America Retina Consultants, P.A. | Overland Park KS US                      | Photographer                                            |                                                                                            |
| Elizabeth N.                      | Heim       |                       | BSN, RN          | Mid-America Retina Consultants, P.A. | Overland Park KS US                      | Coordinator                                             |                                                                                            |
| Mary C                            | Stewart    |                       | RN               | Mid-America Retina Consultants, P.A. | Overland Park KS US                      | Photographer                                            |                                                                                            |
| R. Scott                          | Varner     |                       |                  | Mid-America Retina Consultants, P.A. | Overland Park KS US                      | Photographer                                            |                                                                                            |
| Sarah N.                          | Lamaster   |                       | RN, BSN          | Mid-America Retina Consultants, P.A. | Overland Park KS US                      | Coordinator                                             |                                                                                            |

## Supplemental Online Content: Nonauthor Collaborators

\*First name, last name, and suffix (if applicable) are required and will appear in PubMed.

| *First Name and Middle Initial(s) | *Last Name  | *Suffix (eg, Jr, III) | Academic Degrees | Institution                          | Location (city, state/province, country) | Role or Contribution, eg, chair, principal investigator | Group (if more than 1 Group listed in the byline) and/or Subgroup (eg, Steering Committee) |
|-----------------------------------|-------------|-----------------------|------------------|--------------------------------------|------------------------------------------|---------------------------------------------------------|--------------------------------------------------------------------------------------------|
| William N.                        | Rosenthal   |                       | MD               | Mid-America Retina Consultants, P.A. | Overland Park KS US                      | Investigator                                            |                                                                                            |
| Brenda                            | Nakoski     |                       |                  | Retinal Consultants of San Antonio   | San Antonio TX US                        | Photographer                                            |                                                                                            |
| Calvin E.                         | Mein        |                       | MD               | Retinal Consultants of San Antonio   | San Antonio TX US                        | Investigator                                            |                                                                                            |
| Celeste A                         | Belmontes   |                       |                  | Retinal Consultants of San Antonio   | San Antonio TX US                        | Coordinator                                             |                                                                                            |
| Christopher Sean                  | Wienecke    |                       |                  | Retinal Consultants of San Antonio   | San Antonio TX US                        | Photographer                                            |                                                                                            |
| Darrell E.                        | Baskin      |                       | MD               | Retinal Consultants of San Antonio   | San Antonio TX US                        | Investigator                                            |                                                                                            |
| Jonathan                          | San Roman   |                       |                  | Retinal Consultants of San Antonio   | San Antonio TX US                        | VA Tester                                               |                                                                                            |
| Jorge                             | Castellanos |                       |                  | Retinal Consultants of San Antonio   | San Antonio TX US                        | Photographer                                            |                                                                                            |
| Lita                              | Kirschbaum  |                       | COA              | Retinal Consultants of San Antonio   | San Antonio TX US                        | Coordinator                                             |                                                                                            |
| Lydia                             | Adams       |                       |                  | Retinal Consultants of San Antonio   | San Antonio TX US                        | Coordinator                                             |                                                                                            |
| Moises A.                         | Chica       |                       | MD               | Retinal Consultants of San Antonio   | San Antonio TX US                        | Investigator                                            |                                                                                            |
| Richard Gary                      | Lane        | II                    | MD               | Retinal Consultants of San Antonio   | San Antonio TX US                        | Investigator                                            |                                                                                            |
| Samantha                          | Bankston    |                       |                  | Retinal Consultants of San Antonio   | San Antonio TX US                        | Photographer                                            |                                                                                            |
| Sara L                            | Cloudt      |                       |                  | Retinal Consultants of San Antonio   | San Antonio TX US                        | Coordinator                                             |                                                                                            |
| Vanessa D                         | Martinez    |                       |                  | Retinal Consultants of San Antonio   | San Antonio TX US                        | Coordinator                                             |                                                                                            |

## Supplemental Online Content: Nonauthor Collaborators

\*First name, last name, and suffix (if applicable) are required and will appear in PubMed.

| *First Name and Middle Initial(s) | *Last Name | *Suffix (eg, Jr, III) | Academic Degrees | Institution                                                    | Location (city, state/province, country) | Role or Contribution, eg, chair, principal investigator | Group (if more than 1 Group listed in the byline) and/or Subgroup (eg, Steering Committee) |
|-----------------------------------|------------|-----------------------|------------------|----------------------------------------------------------------|------------------------------------------|---------------------------------------------------------|--------------------------------------------------------------------------------------------|
| Victoria                          | Lopez      |                       |                  | Retinal Consultants of San Antonio                             | San Antonio TX US                        | Coordinator                                             |                                                                                            |
| Annika S.                         | Joshi      |                       | COA, CCRC        | Baylor College of Medicine, Baylor Eye Physicians and Surgeons | Houston TX US                            | Coordinator                                             |                                                                                            |
| April                             | Leger      |                       | COT              | Baylor College of Medicine, Baylor Eye Physicians and Surgeons | Houston TX US                            | VA Tester                                               |                                                                                            |
| Becky R.                          | Chatham    |                       |                  | Baylor College of Medicine, Baylor Eye Physicians and Surgeons | Houston TX US                            | Coordinator                                             |                                                                                            |
| Christina Y.                      | Weng       |                       | MD, MBA          | Baylor College of Medicine, Baylor Eye Physicians and Surgeons | Houston TX US                            | Investigator                                            |                                                                                            |
| Dana B.                           | Barnett    |                       |                  | Baylor College of Medicine, Baylor Eye Physicians and Surgeons | Houston TX US                            | Photographer                                            |                                                                                            |
| Ella                              | Leung      |                       | MD               | Baylor College of Medicine, Baylor Eye Physicians and Surgeons | Houston TX US                            | Investigator                                            |                                                                                            |
| Jiping                            | Cai        |                       | M.D.             | Baylor College of Medicine, Baylor Eye Physicians and Surgeons | Houston TX US                            | Coordinator                                             |                                                                                            |
| Joseph F.                         | Morales    |                       |                  | Baylor College of Medicine, Baylor Eye Physicians and Surgeons | Houston TX US                            | Photographer                                            |                                                                                            |
| Laura A                           | Baker      |                       |                  | Baylor College of Medicine, Baylor Eye Physicians and Surgeons | Houston TX US                            | Coordinator                                             |                                                                                            |

## Supplemental Online Content: Nonauthor Collaborators

\*First name, last name, and suffix (if applicable) are required and will appear in PubMed.

| *First Name and Middle Initial(s) | *Last Name  | *Suffix (eg, Jr, III) | Academic Degrees | Institution                                                    | Location (city, state/province, country) | Role or Contribution, eg, chair, principal investigator | Group (if more than 1 Group listed in the byline) and/or Subgroup (eg, Steering Committee) |
|-----------------------------------|-------------|-----------------------|------------------|----------------------------------------------------------------|------------------------------------------|---------------------------------------------------------|--------------------------------------------------------------------------------------------|
| Tahira                            | Scholle     |                       | MD               | Baylor College of Medicine, Baylor Eye Physicians and Surgeons | Houston TX US                            | Investigator                                            |                                                                                            |
| Amy                               | Volpigno    |                       |                  | Retina Associates of Sarasota                                  | Venice FL US                             | Photographer                                            |                                                                                            |
| Arysol                            | Niffenegger |                       | MD               | Retina Associates of Sarasota                                  | Venice FL US                             | Coordinator                                             |                                                                                            |
| Bruce A.                          | Bentsen     |                       | COT              | Retina Associates of Sarasota                                  | Venice FL US                             | VA Tester                                               |                                                                                            |
| Donna                             | Scully      |                       | OD               | Retina Associates of Sarasota                                  | Venice FL US                             | Coordinator                                             |                                                                                            |
| Elizabeth R.                      | Richter     |                       | MD, PhD          | Retina Associates of Sarasota                                  | Venice FL US                             | Investigator                                            |                                                                                            |
| John H.                           | Niffenegger |                       | MD               | Retina Associates of Sarasota                                  | Venice FL US                             | Investigator                                            |                                                                                            |
| Marianne                          | Cottrill    |                       |                  | Retina Associates of Sarasota                                  | Venice FL US                             | Coordinator                                             |                                                                                            |
| Marisol                           | Lopez       |                       |                  | Retina Associates of Sarasota                                  | Venice FL US                             | Photographer                                            |                                                                                            |
| Avni Patel                        | Vyas        |                       | MD               | Retina-Vitreous Consultants, Inc.                              | Monroeville PA US                        | Investigator                                            |                                                                                            |
| Bernard H.                        | Doft        |                       | MD               | Retina-Vitreous Consultants, Inc.                              | Monroeville PA US                        | Investigator                                            |                                                                                            |
| Brittany                          | Stout       |                       |                  | Retina-Vitreous Consultants, Inc.                              | Monroeville PA US                        | VA Tester                                               |                                                                                            |
| Courtney L.                       | Foreman     |                       |                  | Retina-Vitreous Consultants, Inc.                              | Monroeville PA US                        | Photographer                                            |                                                                                            |
| Dawn                              | Diperna     |                       |                  | Retina-Vitreous Consultants, Inc.                              | Monroeville PA US                        | Photographer                                            |                                                                                            |
| Jared E.                          | Knickelbein |                       | MD, PhD          | Retina-Vitreous Consultants, Inc.                              | Monroeville PA US                        | Investigator                                            |                                                                                            |
| Julie                             | Walter      |                       |                  | Retina-Vitreous Consultants, Inc.                              | Monroeville PA US                        | VA Tester                                               |                                                                                            |
| Karl R.                           | Olsen       |                       | MD               | Retina-Vitreous Consultants, Inc.                              | Monroeville PA US                        | Investigator                                            |                                                                                            |
| Lois                              | Stepansky   |                       |                  | Retina-Vitreous Consultants, Inc.                              | Monroeville PA US                        | VA Tester                                               |                                                                                            |
| Lori A.                           | Merlotti    |                       |                  | Retina-Vitreous Consultants, Inc.                              | Monroeville PA US                        | Coordinator                                             |                                                                                            |

## Supplemental Online Content: Nonauthor Collaborators

\*First name, last name, and suffix (if applicable) are required and will appear in PubMed.

| *First Name and Middle Initial(s) | *Last Name | *Suffix (eg, Jr, III) | Academic Degrees | Institution                             | Location (city, state/province, country) | Role or Contribution, eg, chair, principal investigator | Group (if more than 1 Group listed in the byline) and/or Subgroup (eg, Steering Committee) |
|-----------------------------------|------------|-----------------------|------------------|-----------------------------------------|------------------------------------------|---------------------------------------------------------|--------------------------------------------------------------------------------------------|
| Missy A.                          | Forish     |                       |                  | Retina-Vitreous Consultants, Inc.       | Monroeville PA US                        | Coordinator                                             |                                                                                            |
| P. William                        | Conrad     |                       | MD, PhD          | Retina-Vitreous Consultants, Inc.       | Monroeville PA US                        | Investigator                                            |                                                                                            |
| Phyllis P                         | Ostroska   |                       |                  | Retina-Vitreous Consultants, Inc.       | Monroeville PA US                        | Photographer                                            |                                                                                            |
| Robert L.                         | Bergren    |                       | MD               | Retina-Vitreous Consultants, Inc.       | Monroeville PA US                        | Investigator                                            |                                                                                            |
| Andrea K.                         | Menzel     |                       | COA              | Western Carolina Clinical Research, LLC | Asheville NC US                          | Coordinator                                             |                                                                                            |
| Ashley Hinson                     | Klutz      |                       |                  | Western Carolina Clinical Research, LLC | Asheville NC US                          | VA Tester                                               |                                                                                            |
| Cameron McLure                    | Stone      |                       | MD               | Western Carolina Clinical Research, LLC | Asheville NC US                          | Investigator                                            |                                                                                            |
| Donna                             | Machen     |                       |                  | Western Carolina Clinical Research, LLC | Asheville NC US                          | VA Tester                                               |                                                                                            |
| Julia Crockett                    | Overbey    |                       |                  | Western Carolina Clinical Research, LLC | Asheville NC US                          | VA Tester                                               |                                                                                            |
| Kaitlyn Marie                     | Cutshaw    |                       |                  | Western Carolina Clinical Research, LLC | Asheville NC US                          | VA Tester                                               |                                                                                            |
| Lea R.                            | Raymer     |                       | BS               | Western Carolina Clinical Research, LLC | Asheville NC US                          | Coordinator                                             |                                                                                            |
| Leslie D.                         | Rickman    |                       | COA              | Western Carolina Clinical Research, LLC | Asheville NC US                          | VA Tester                                               |                                                                                            |
| Lisa H.                           | Hawkins    |                       | COA              | Western Carolina Clinical Research, LLC | Asheville NC US                          | Photographer                                            |                                                                                            |
| McCayla Elise                     | Hall       |                       |                  | Western Carolina Clinical Research, LLC | Asheville NC US                          | Coordinator                                             |                                                                                            |
| Melissa                           | Smith      |                       |                  | Western Carolina Clinical Research, LLC | Asheville NC US                          | Photographer                                            |                                                                                            |



## Supplemental Online Content: Nonauthor Collaborators

\*First name, last name, and suffix (if applicable) are required and will appear in PubMed.

| *First Name and Middle Initial(s) | *Last Name | *Suffix (eg, Jr, III) | Academic Degrees | Institution                                                             | Location (city, state/province, country) | Role or Contribution, eg, chair, principal investigator | Group (if more than 1 Group listed in the byline) and/or Subgroup (eg, Steering Committee) |
|-----------------------------------|------------|-----------------------|------------------|-------------------------------------------------------------------------|------------------------------------------|---------------------------------------------------------|--------------------------------------------------------------------------------------------|
| Monica                            | Hamrick    |                       |                  | Western Carolina Clinical Research, LLC                                 | Asheville NC US                          | Coordinator                                             |                                                                                            |
| Paula A.                          | Price      |                       | COT              | Western Carolina Clinical Research, LLC                                 | Asheville NC US                          | Photographer                                            |                                                                                            |
| Holly L.                          | Vincent    |                       | COA              | Foundation for Vision Research and Retina Specialists of Michigan, P.C. | GRAND RAPIDS MI US                       | Coordinator                                             |                                                                                            |
| Kimberly                          | Barrett    |                       |                  | Foundation for Vision Research and Retina Specialists of Michigan, P.C. | GRAND RAPIDS MI US                       | VA Tester                                               |                                                                                            |
| Kristyn Jae                       | Fredrick   |                       |                  | Foundation for Vision Research and Retina Specialists of Michigan, P.C. | GRAND RAPIDS MI US                       | Coordinator                                             |                                                                                            |
| Liliya                            | Shevchenko |                       | DO               | Foundation for Vision Research and Retina Specialists of Michigan, P.C. | GRAND RAPIDS MI US                       | Investigator                                            |                                                                                            |
| Nathan F.                         | Pezda      |                       | MD               | Foundation for Vision Research and Retina Specialists of Michigan, P.C. | GRAND RAPIDS MI US                       | Investigator                                            |                                                                                            |
| Olivia P                          | Rainey     |                       | BFA              | Foundation for Vision Research and Retina Specialists of Michigan, P.C. | GRAND RAPIDS MI US                       | Photographer                                            |                                                                                            |
| Scott J.                          | Westhouse  |                       | DO               | Foundation for Vision Research and Retina Specialists of Michigan, P.C. | GRAND RAPIDS MI US                       | Investigator                                            |                                                                                            |
| Shymaa                            | Mohamed    |                       |                  | Foundation for Vision Research and Retina Specialists of Michigan, P.C. | GRAND RAPIDS MI US                       | Photographer                                            |                                                                                            |
| Thomas M.                         | Aaberg     | Jr.                   | MD               | Foundation for Vision Research and Retina Specialists of Michigan, P.C. | GRAND RAPIDS MI US                       | Investigator                                            |                                                                                            |

## Supplemental Online Content: Nonauthor Collaborators

\*First name, last name, and suffix (if applicable) are required and will appear in PubMed.

| *First Name and Middle Initial(s) | *Last Name   | *Suffix (eg, Jr, III) | Academic Degrees | Institution                                                         | Location (city, state/province, country) | Role or Contribution, eg, chair, principal investigator | Group (if more than 1 Group listed in the byline) and/or Subgroup (eg, Steering Committee) |
|-----------------------------------|--------------|-----------------------|------------------|---------------------------------------------------------------------|------------------------------------------|---------------------------------------------------------|--------------------------------------------------------------------------------------------|
| Daniel F.                         | Rosberger    |                       | MD, PhD, MPH     | MaculaCare                                                          | New York NY US                           | Investigator                                            |                                                                                            |
| Phuntsho                          | Wangmo       |                       | BA               | MaculaCare                                                          | New York NY US                           | Coordinator                                             |                                                                                            |
| Sonam                             | Gyaltshen    |                       |                  | MaculaCare                                                          | New York NY US                           | Coordinator                                             |                                                                                            |
| Adriana                           | Villa        |                       |                  | Eye Physicians of Florida LLC DBA Fort Lauderdale Eye Institute LLC | Plantation FL US                         | VA Tester                                               |                                                                                            |
| Karen                             | Workman      |                       |                  | Eye Physicians of Florida LLC DBA Fort Lauderdale Eye Institute LLC | Plantation FL US                         | Photographer                                            |                                                                                            |
| Mark                              | Oberlander   |                       |                  | Eye Physicians of Florida LLC DBA Fort Lauderdale Eye Institute LLC | Plantation FL US                         | Photographer                                            |                                                                                            |
| Noel H.                           | Pereda       |                       | MD               | Eye Physicians of Florida LLC DBA Fort Lauderdale Eye Institute LLC | Plantation FL US                         | Coordinator                                             |                                                                                            |
| Stuart K.                         | Burgess      |                       | MD               | Eye Physicians of Florida LLC DBA Fort Lauderdale Eye Institute LLC | Plantation FL US                         | Investigator                                            |                                                                                            |
| Tirso M.                          | Lara         |                       | MD               | Eye Physicians of Florida LLC DBA Fort Lauderdale Eye Institute LLC | Plantation FL US                         | Investigator                                            |                                                                                            |
| Chris A.                          | Montesclaros |                       |                  | Austin Retina Associates                                            | AUSTIN TX US                             | Coordinator                                             |                                                                                            |
| Corinne C                         | Vargas       |                       |                  | Austin Retina Associates                                            | AUSTIN TX US                             | Coordinator                                             |                                                                                            |
| Cory                              | Mangham      |                       |                  | Austin Retina Associates                                            | AUSTIN TX US                             | Photographer                                            |                                                                                            |
| Gopal                             | Karsaliya    |                       |                  | Austin Retina Associates                                            | AUSTIN TX US                             | Coordinator                                             |                                                                                            |
| Jose A.                           | Martinez     |                       | MD               | Austin Retina Associates                                            | AUSTIN TX US                             | Investigator                                            |                                                                                            |
| Peter A.                          | Nixon        |                       | MD               | Austin Retina Associates                                            | AUSTIN TX US                             | Investigator                                            |                                                                                            |
| Phillip V.                        | Le           |                       |                  | Austin Retina Associates                                            | AUSTIN TX US                             | Coordinator                                             |                                                                                            |
| Robert W.                         | Wong         |                       | MD               | Austin Retina Associates                                            | AUSTIN TX US                             | Investigator                                            |                                                                                            |
| Ryan C.                           | Young        |                       | MD               | Austin Retina Associates                                            | AUSTIN TX US                             | Investigator                                            |                                                                                            |

## Supplemental Online Content: Nonauthor Collaborators

\*First name, last name, and suffix (if applicable) are required and will appear in PubMed.

| *First Name and Middle Initial(s) | *Last Name | *Suffix (eg, Jr, III) | Academic Degrees | Institution                         | Location (city, state/province, country) | Role or Contribution, eg, chair, principal investigator | Group (if more than 1 Group listed in the byline) and/or Subgroup (eg, Steering Committee) |
|-----------------------------------|------------|-----------------------|------------------|-------------------------------------|------------------------------------------|---------------------------------------------------------|--------------------------------------------------------------------------------------------|
| Andrew G.                         | Cheek      |                       | MD               | Spokane Eye Clinical Research, PLLC | Spokane WA US                            | Investigator                                            |                                                                                            |
| Brian G                           | Skea       |                       |                  | Spokane Eye Clinical Research, PLLC | Spokane WA US                            | Coordinator                                             |                                                                                            |
| Dylan C.                          | Waidelich  |                       | COA              | Spokane Eye Clinical Research, PLLC | Spokane WA US                            | Coordinator                                             |                                                                                            |
| Eileen A.                         | Dittman    |                       | CCRC, RN         | Spokane Eye Clinical Research, PLLC | Spokane WA US                            | Coordinator                                             |                                                                                            |
| Jillian N                         | Erstad     |                       |                  | Spokane Eye Clinical Research, PLLC | Spokane WA US                            | Coordinator                                             |                                                                                            |
| Loren S.                          | Jack       |                       | MD               | Spokane Eye Clinical Research, PLLC | Spokane WA US                            | Investigator                                            |                                                                                            |
| Robert S.                         | Wirthlin   |                       | MD               | Spokane Eye Clinical Research, PLLC | Spokane WA US                            | Investigator                                            |                                                                                            |
| Amr                               | Dessouki   |                       | MD               | Retinal Diagnostic Center           | Campbell CA US                           | Investigator                                            |                                                                                            |
| Carla                             | Trujillo   |                       |                  | Retinal Diagnostic Center           | Campbell CA US                           | Coordinator                                             |                                                                                            |
| Clement                           | Chow       |                       | MD               | Retinal Diagnostic Center           | Campbell CA US                           | Investigator                                            |                                                                                            |
| Danielle                          | Dinh       |                       |                  | Retinal Diagnostic Center           | Campbell CA US                           | Coordinator                                             |                                                                                            |
| Hienmy                            | Dang       |                       |                  | Retinal Diagnostic Center           | Campbell CA US                           | VA Tester                                               |                                                                                            |
| Juan                              | Hernandez  |                       |                  | Retinal Diagnostic Center           | Campbell CA US                           | Photographer                                            |                                                                                            |
| Kelly                             | To         |                       |                  | Retinal Diagnostic Center           | Campbell CA US                           | VA Tester                                               |                                                                                            |
| Lingmin                           | He         |                       | MD               | Retinal Diagnostic Center           | Campbell CA US                           | Investigator                                            |                                                                                            |
| Lynise                            | Cummins    |                       |                  | Retinal Diagnostic Center           | Campbell CA US                           | Coordinator                                             |                                                                                            |
| Paola                             | Montes     |                       |                  | Retinal Diagnostic Center           | Campbell CA US                           | VA Tester                                               |                                                                                            |
| Pete Donovan                      | Fernandez  |                       |                  | Retinal Diagnostic Center           | Campbell CA US                           | Photographer                                            |                                                                                            |
| Tim                               | Kelley     |                       |                  | Retinal Diagnostic Center           | Campbell CA US                           | Photographer                                            |                                                                                            |
| Whitney                           | Kuang      |                       |                  | Retinal Diagnostic Center           | Campbell CA US                           | Coordinator                                             |                                                                                            |
| Anita Kim                         | Malzahn    |                       |                  | Retina Associates of Florida, LLC   | Tampa FL US                              | Photographer                                            |                                                                                            |
| Demi                              | DeSilva    |                       |                  | Retina Associates of Florida, LLC   | Tampa FL US                              | Photographer                                            |                                                                                            |

## Supplemental Online Content: Nonauthor Collaborators

\*First name, last name, and suffix (if applicable) are required and will appear in PubMed.

| *First Name and Middle Initial(s) | *Last Name | *Suffix (eg, Jr, III) | Academic Degrees | Institution                           | Location (city, state/province, country) | Role or Contribution, eg, chair, principal investigator | Group (if more than 1 Group listed in the byline) and/or Subgroup (eg, Steering Committee) |
|-----------------------------------|------------|-----------------------|------------------|---------------------------------------|------------------------------------------|---------------------------------------------------------|--------------------------------------------------------------------------------------------|
| Heidi                             | Vargo      |                       | COT              | Retina Associates of Florida, LLC     | Tampa FL US                              | VA Tester                                               |                                                                                            |
| Ivan J.                           | Suner      |                       | MD               | Retina Associates of Florida, LLC     | Tampa FL US                              | Investigator                                            |                                                                                            |
| Janet R.                          | Traynom    |                       | COT              | Retina Associates of Florida, LLC     | Tampa FL US                              | Coordinator                                             |                                                                                            |
| Kim                               | Henderson  |                       |                  | Retina Associates of Florida, LLC     | Tampa FL US                              | Photographer                                            |                                                                                            |
| Marc C.                           | Peden      |                       | MD               | Retina Associates of Florida, LLC     | Tampa FL US                              | Investigator                                            |                                                                                            |
| Stephanie                         | Munoz      |                       | COA              | Retina Associates of Florida, LLC     | Tampa FL US                              | Coordinator                                             |                                                                                            |
| Susan                             | Ramsey     |                       |                  | Retina Associates of Florida, LLC     | Tampa FL US                              | VA Tester                                               |                                                                                            |
| Adelyn                            | Wetzel     |                       | BS               | Thomas Eye Group                      | SANDY SPRINGS GA US                      | Coordinator                                             |                                                                                            |
| Carlos R.                         | Cook       |                       |                  | Thomas Eye Group                      | SANDY SPRINGS GA US                      | Photographer                                            |                                                                                            |
| Cynthia                           | Weaver     |                       | COT              | Thomas Eye Group                      | SANDY SPRINGS GA US                      | VA Tester                                               |                                                                                            |
| Jessica D.                        | McCluskey  |                       | MD               | Thomas Eye Group                      | SANDY SPRINGS GA US                      | Investigator                                            |                                                                                            |
| Kathy T.                          | Wynne      |                       | BS, COT          | Thomas Eye Group                      | SANDY SPRINGS GA US                      | Coordinator                                             |                                                                                            |
| Paul L.                           | Kaufman    |                       | MD               | Thomas Eye Group                      | SANDY SPRINGS GA US                      | Investigator                                            |                                                                                            |
| Sarah                             | Matloff    |                       | COA              | Thomas Eye Group                      | SANDY SPRINGS GA US                      | Photographer                                            |                                                                                            |
| Ann                               | Reynard    |                       | COA              | Retina Associates of Western NY, P.C. | ROCHESTER NY US                          | VA Tester                                               |                                                                                            |
| Brian P.                          | Connolly   |                       | MD               | Retina Associates of Western NY, P.C. | ROCHESTER NY US                          | Investigator                                            |                                                                                            |
| Edward F.                         | Hall       |                       | MD               | Retina Associates of Western NY, P.C. | ROCHESTER NY US                          | Investigator                                            |                                                                                            |
| Joe                               | Territo    |                       |                  | Retina Associates of Western NY, P.C. | ROCHESTER NY US                          | Photographer                                            |                                                                                            |
| Malinda                           | Goole      |                       |                  | Retina Associates of Western NY, P.C. | ROCHESTER NY US                          | VA Tester                                               |                                                                                            |

## Supplemental Online Content: Nonauthor Collaborators

\*First name, last name, and suffix (if applicable) are required and will appear in PubMed.

| *First Name and Middle Initial(s) | *Last Name      | *Suffix (eg, Jr, III) | Academic Degrees | Institution                                                | Location (city, state/province, country) | Role or Contribution, eg, chair, principal investigator | Group (if more than 1 Group listed in the byline) and/or Subgroup (eg, Steering Committee) |
|-----------------------------------|-----------------|-----------------------|------------------|------------------------------------------------------------|------------------------------------------|---------------------------------------------------------|--------------------------------------------------------------------------------------------|
| Margaret                          | Whelehan        |                       | BS               | Retina Associates of Western NY, P.C.                      | ROCHESTER NY US                          | Photographer                                            |                                                                                            |
| Margaret M.                       | Yagoda          |                       | RN, BSN          | Retina Associates of Western NY, P.C.                      | ROCHESTER NY US                          | Coordinator                                             |                                                                                            |
| Mary Jo                           | Doran           |                       | COA              | Retina Associates of Western NY, P.C.                      | ROCHESTER NY US                          | Coordinator                                             |                                                                                            |
| Matthew T.                        | Witmer          |                       | MD               | Retina Associates of Western NY, P.C.                      | ROCHESTER NY US                          | Investigator                                            |                                                                                            |
| Mindy                             | Burgess         |                       | AAS              | Retina Associates of Western NY, P.C.                      | ROCHESTER NY US                          | VA Tester                                               |                                                                                            |
| Ryan W                            | Nelson          |                       | BS               | Retina Associates of Western NY, P.C.                      | ROCHESTER NY US                          | Photographer                                            |                                                                                            |
| Steven J.                         | Rose            |                       | MD               | Retina Associates of Western NY, P.C.                      | ROCHESTER NY US                          | Investigator                                            |                                                                                            |
| Susan                             | Warrington      |                       |                  | Retina Associates of Western NY, P.C.                      | ROCHESTER NY US                          | Photographer                                            |                                                                                            |
| Alma                              | Rodriguez       |                       |                  | Florida Retina Institute, James A. Staman, MD, PA- Orlando | ORLANDO FL US                            | Photographer                                            |                                                                                            |
| Carolina Figueroa                 | Ortiz           |                       |                  | Florida Retina Institute, James A. Staman, MD, PA- Orlando | ORLANDO FL US                            | VA Tester                                               |                                                                                            |
| Dianelis                          | Figueroa        |                       |                  | Florida Retina Institute, James A. Staman, MD, PA- Orlando | ORLANDO FL US                            | Photographer                                            |                                                                                            |
| Elaine                            | Rodriguez-Roman |                       | OD               | Florida Retina Institute, James A. Staman, MD, PA- Orlando | ORLANDO FL US                            | Coordinator                                             |                                                                                            |
| Elias C.                          | Mavrofrides     |                       | MD               | Florida Retina Institute, James A. Staman, MD, PA- Orlando | ORLANDO FL US                            | Investigator                                            |                                                                                            |
| Jaya B.                           | Kumar           |                       | MD               | Florida Retina Institute, James A. Staman, MD, PA- Orlando | ORLANDO FL US                            | Investigator                                            |                                                                                            |
| Martha                            | Haddox          |                       |                  | Florida Retina Institute, James A. Staman, MD, PA- Orlando | ORLANDO FL US                            | Coordinator                                             |                                                                                            |

## Supplemental Online Content: Nonauthor Collaborators

\*First name, last name, and suffix (if applicable) are required and will appear in PubMed.

| *First Name and Middle Initial(s) | *Last Name | *Suffix (eg, Jr, III) | Academic Degrees | Institution                                                | Location (city, state/province, country) | Role or Contribution, eg, chair, principal investigator | Group (if more than 1 Group listed in the byline) and/or Subgroup (eg, Steering Committee) |
|-----------------------------------|------------|-----------------------|------------------|------------------------------------------------------------|------------------------------------------|---------------------------------------------------------|--------------------------------------------------------------------------------------------|
| Matthew A.                        | Cunningham |                       | MD               | Florida Retina Institute, James A. Staman, MD, PA- Orlando | ORLANDO FL US                            | Investigator                                            |                                                                                            |
| Ramona                            | Gomez      |                       |                  | Florida Retina Institute, James A. Staman, MD, PA- Orlando | ORLANDO FL US                            | Coordinator                                             |                                                                                            |
| Samuel K. S.                      | Houston    |                       | III, MD          | Florida Retina Institute, James A. Staman, MD, PA- Orlando | ORLANDO FL US                            | Investigator                                            |                                                                                            |
| Timothy S                         | Holle      |                       |                  | Florida Retina Institute, James A. Staman, MD, PA- Orlando | ORLANDO FL US                            | Photographer                                            |                                                                                            |
| Ana                               | Neyra      |                       |                  | Retina Macula Specialists of Miami                         | MIAMI FL US                              | Coordinator                                             |                                                                                            |
| David                             | Lara       |                       |                  | Retina Macula Specialists of Miami                         | MIAMI FL US                              | Photographer                                            |                                                                                            |
| Gary                              | Shienbaum  |                       | MD               | Retina Macula Specialists of Miami                         | MIAMI FL US                              | Investigator                                            |                                                                                            |
| Jaziel                            | Rodriguez  |                       |                  | Retina Macula Specialists of Miami                         | MIAMI FL US                              | Coordinator                                             |                                                                                            |
| Marco A.                          | Gonzalez   |                       | MD               | Retina Macula Specialists of Miami                         | MIAMI FL US                              | Investigator                                            |                                                                                            |
| Pamela                            | Garcia     |                       |                  | Retina Macula Specialists of Miami                         | MIAMI FL US                              | Coordinator                                             |                                                                                            |
| Wilfredo C.                       | Lara       |                       | MD               | Retina Macula Specialists of Miami                         | MIAMI FL US                              | Investigator                                            |                                                                                            |
| Alejandra                         | Castro     |                       |                  | Kent W. Small, MD, AMC                                     | GLENDALE CA US                           | Photographer                                            |                                                                                            |
| Cristina                          | Santacruz  |                       |                  | Kent W. Small, MD, AMC                                     | GLENDALE CA US                           | Photographer                                            |                                                                                            |
| Fadi S.                           | Shaya      |                       |                  | Kent W. Small, MD, AMC                                     | GLENDALE CA US                           | Coordinator                                             |                                                                                            |
| Kent W.                           | Small      |                       | MD               | Kent W. Small, MD, AMC                                     | GLENDALE CA US                           | Investigator                                            |                                                                                            |
| Afsoon                            | Jamali     |                       |                  | East Bay Retina Consultants, Inc.                          | OAKLAND CA US                            | Photographer                                            |                                                                                            |
| Denise Joy                        | Bustamante |                       |                  | East Bay Retina Consultants, Inc.                          | OAKLAND CA US                            | VA Tester                                               |                                                                                            |

Supplemental Online Content: Nonauthor Collaborators

\*First name, last name, and suffix (if applicable) are required and will appear in PubMed.

| *First Name and Middle Initial(s) | *Last Name      | *Suffix (eg, Jr, III) | Academic Degrees | Institution                        | Location (city, state/province, country) | Role or Contribution, eg, chair, principal investigator | Group (if more than 1 Group listed in the byline) and/or Subgroup (eg, Steering Committee) |
|-----------------------------------|-----------------|-----------------------|------------------|------------------------------------|------------------------------------------|---------------------------------------------------------|--------------------------------------------------------------------------------------------|
| Heidi A.                          | Winje           |                       |                  | East Bay Retina Consultants, Inc.  | OAKLAND CA US                            | Coordinator                                             |                                                                                            |
| Helen                             | Ricks           |                       |                  | East Bay Retina Consultants, Inc.  | OAKLAND CA US                            | VA Tester                                               |                                                                                            |
| Mae                               | Kwan            |                       |                  | East Bay Retina Consultants, Inc.  | OAKLAND CA US                            | VA Tester                                               |                                                                                            |
| Maria                             | Miranda         |                       |                  | East Bay Retina Consultants, Inc.  | OAKLAND CA US                            | Photographer                                            |                                                                                            |
| Soraya                            | Rofagha         |                       | MD, MPH          | East Bay Retina Consultants, Inc.  | OAKLAND CA US                            | Investigator                                            |                                                                                            |
| Amanda                            | Aho             |                       |                  | Valley Eye Physicians and Surgeons | AYER MA US                               | Photographer                                            |                                                                                            |
| Bethany A.                        | Haight          |                       |                  | Valley Eye Physicians and Surgeons | AYER MA US                               | Photographer                                            |                                                                                            |
| Chandapilla C.                    | Pallipeedikayil |                       |                  | Valley Eye Physicians and Surgeons | AYER MA US                               | Photographer                                            |                                                                                            |
| Crystal                           | Girard          |                       |                  | Valley Eye Physicians and Surgeons | AYER MA US                               | Photographer                                            |                                                                                            |
| Daniel                            | Tedstone        |                       |                  | Valley Eye Physicians and Surgeons | AYER MA US                               | Photographer                                            |                                                                                            |
| Elizabeth I.                      | Johnson         |                       | MS               | Valley Eye Physicians and Surgeons | AYER MA US                               | Coordinator                                             |                                                                                            |
| Gisela                            | Velez           |                       | MD, MPH, MA      | Valley Eye Physicians and Surgeons | AYER MA US                               | Investigator                                            |                                                                                            |
| Jean                              | Larkin          |                       |                  | Valley Eye Physicians and Surgeons | AYER MA US                               | Photographer                                            |                                                                                            |
| Jhan Carlos                       | Caro            |                       |                  | Valley Eye Physicians and Surgeons | AYER MA US                               | Photographer                                            |                                                                                            |
| Lawrence I.                       | Rand            |                       | MD               | Valley Eye Physicians and Surgeons | AYER MA US                               | Investigator                                            |                                                                                            |

Supplemental Online Content: Nonauthor Collaborators

\*First name, last name, and suffix (if applicable) are required and will appear in PubMed.

| *First Name and Middle Initial(s) | *Last Name     | *Suffix (eg, Jr, III) | Academic Degrees | Institution                                                                 | Location (city, state/province, country) | Role or Contribution, eg, chair, principal investigator | Group (if more than 1 Group listed in the byline) and/or Subgroup (eg, Steering Committee) |
|-----------------------------------|----------------|-----------------------|------------------|-----------------------------------------------------------------------------|------------------------------------------|---------------------------------------------------------|--------------------------------------------------------------------------------------------|
| Maa Ahema                         | Parry          |                       | O.D., M.Ed.      | Valley Eye Physicians and Surgeons                                          | AYER MA US                               | Coordinator                                             |                                                                                            |
| Michael D.                        | Ortega         |                       | CMA              | Valley Eye Physicians and Surgeons                                          | AYER MA US                               | Photographer                                            |                                                                                            |
| Nicholas R                        | Mastrodomenico |                       |                  | Valley Eye Physicians and Surgeons                                          | AYER MA US                               | VA Tester                                               |                                                                                            |
| Oksana                            | Mykhaylyk      |                       |                  | Valley Eye Physicians and Surgeons                                          | AYER MA US                               | Coordinator                                             |                                                                                            |
| Thomas                            | Taylor         |                       |                  | Valley Eye Physicians and Surgeons                                          | AYER MA US                               | Photographer                                            |                                                                                            |
| Travis                            | Sweeney        |                       |                  | Valley Eye Physicians and Surgeons                                          | AYER MA US                               | Coordinator                                             |                                                                                            |
| Amanda                            | Fox            |                       |                  | Springfield Clinic, LLP                                                     | SPRINGFIELD IL US                        | VA Tester                                               |                                                                                            |
| Bradley C.                        | Evans          |                       | LPN, COA         | Springfield Clinic, LLP                                                     | SPRINGFIELD IL US                        | Coordinator                                             |                                                                                            |
| Caitlyn                           | Wessel         |                       |                  | Springfield Clinic, LLP                                                     | SPRINGFIELD IL US                        | Photographer                                            |                                                                                            |
| Gaylan W                          | Moushon        |                       | OD               | Springfield Clinic, LLP                                                     | SPRINGFIELD IL US                        | VA Tester                                               |                                                                                            |
| Jennifer                          | Shaw           |                       |                  | Springfield Clinic, LLP                                                     | SPRINGFIELD IL US                        | Coordinator                                             |                                                                                            |
| Kris                              | Karrick        |                       | COA              | Springfield Clinic, LLP                                                     | SPRINGFIELD IL US                        | Photographer                                            |                                                                                            |
| Ramanath                          | Bhandari       |                       | MD               | Springfield Clinic, LLP                                                     | SPRINGFIELD IL US                        | Investigator                                            |                                                                                            |
| Dusti D                           | Douglas        |                       |                  | Joseph E. Humble and Raymond Haik PTRS DBA Eye Assoc of Northeast Louisiana | WEST MONROE LA US                        | VA Tester                                               |                                                                                            |
| Latha M                           | Jois           |                       |                  | Joseph E. Humble and Raymond Haik PTRS DBA Eye Assoc of Northeast Louisiana | WEST MONROE LA US                        | Coordinator                                             |                                                                                            |
| Molly K.                          | Cummings       |                       |                  | Joseph E. Humble and Raymond Haik PTRS DBA Eye Assoc of Northeast Louisiana | WEST MONROE LA US                        | VA Tester                                               |                                                                                            |



## Supplemental Online Content: Nonauthor Collaborators

\*First name, last name, and suffix (if applicable) are required and will appear in PubMed.

| *First Name and Middle Initial(s) | *Last Name   | *Suffix (eg, Jr, III) | Academic Degrees | Institution                                                                 | Location (city, state/province, country) | Role or Contribution, eg, chair, principal investigator | Group (if more than 1 Group listed in the byline) and/or Subgroup (eg, Steering Committee) |
|-----------------------------------|--------------|-----------------------|------------------|-----------------------------------------------------------------------------|------------------------------------------|---------------------------------------------------------|--------------------------------------------------------------------------------------------|
| Rebecca                           | Morris       |                       |                  | Joseph E. Humble and Raymond Haik PTRS DBA Eye Assoc of Northeast Louisiana | WEST MONROE LA US                        | Coordinator                                             |                                                                                            |
| Rebecca                           | Webb         |                       | BS, CRC          | Joseph E. Humble and Raymond Haik PTRS DBA Eye Assoc of Northeast Louisiana | WEST MONROE LA US                        | Coordinator                                             |                                                                                            |
| Ruben A.                          | Grigorian    |                       | MD               | Joseph E. Humble and Raymond Haik PTRS DBA Eye Assoc of Northeast Louisiana | WEST MONROE LA US                        | Investigator                                            |                                                                                            |
| Sharoon                           | David        |                       | MBBS             | Joseph E. Humble and Raymond Haik PTRS DBA Eye Assoc of Northeast Louisiana | WEST MONROE LA US                        | Coordinator                                             |                                                                                            |
| Treasure                          | Ritchey      |                       |                  | Joseph E. Humble and Raymond Haik PTRS DBA Eye Assoc of Northeast Louisiana | WEST MONROE LA US                        | Photographer                                            |                                                                                            |
| Adam T.                           | Gerstenblith |                       | MD               | Mid Atlantic Retina Specialists                                             | HAGERSTOWN MD US                         | Investigator                                            |                                                                                            |
| Angie                             | Goldizen     |                       |                  | Mid Atlantic Retina Specialists                                             | HAGERSTOWN MD US                         | Photographer                                            |                                                                                            |
| April L.                          | Stockman     |                       |                  | Mid Atlantic Retina Specialists                                             | HAGERSTOWN MD US                         | Coordinator                                             |                                                                                            |
| Jennifer                          | Shirey       |                       |                  | Mid Atlantic Retina Specialists                                             | HAGERSTOWN MD US                         | VA Tester                                               |                                                                                            |
| Kylie                             | Stambaugh    |                       |                  | Mid Atlantic Retina Specialists                                             | HAGERSTOWN MD US                         | VA Tester                                               |                                                                                            |
| Leslie                            | Toomey       |                       |                  | Mid Atlantic Retina Specialists                                             | HAGERSTOWN MD US                         | Photographer                                            |                                                                                            |
| Lora                              | Glaspell     |                       |                  | Mid Atlantic Retina Specialists                                             | HAGERSTOWN MD US                         | Photographer                                            |                                                                                            |
| Robert E.                         | Parnes       |                       | MD               | Mid Atlantic Retina Specialists                                             | HAGERSTOWN MD US                         | Investigator                                            |                                                                                            |
| Andre                             | Watkins      |                       |                  | Jawad A Qureshi MD PA DBA Retina Center of Texas                            | Southlake TX US                          | Photographer                                            |                                                                                            |
| Denise                            | Ortiz        |                       |                  | Jawad A Qureshi MD PA DBA Retina Center of Texas                            | Southlake TX US                          | Photographer                                            |                                                                                            |
| Diana                             | Murillo      |                       |                  | Jawad A Qureshi MD PA DBA Retina Center of Texas                            | Southlake TX US                          | Photographer                                            |                                                                                            |
| Gregory A                         | Dunn         |                       |                  | Jawad A Qureshi MD PA DBA Retina Center of Texas                            | Southlake TX US                          | Coordinator                                             |                                                                                            |

Supplemental Online Content: Nonauthor Collaborators

\*First name, last name, and suffix (if applicable) are required and will appear in PubMed.

| *First Name and Middle Initial(s) | *Last Name | *Suffix (eg, Jr, III) | Academic Degrees | Institution                                                  | Location (city, state/province, country) | Role or Contribution, eg, chair, principal investigator | Group (if more than 1 Group listed in the byline) and/or Subgroup (eg, Steering Committee) |
|-----------------------------------|------------|-----------------------|------------------|--------------------------------------------------------------|------------------------------------------|---------------------------------------------------------|--------------------------------------------------------------------------------------------|
| Jawad A.                          | Qureshi    |                       | MD               | Jawad A Qureshi MD PA DBA Retina Center of Texas             | Southlake TX US                          | Investigator                                            |                                                                                            |
| Johnathan D.                      | Warminski  |                       | MD               | Jawad A Qureshi MD PA DBA Retina Center of Texas             | Southlake TX US                          | Investigator                                            |                                                                                            |
| Pualani                           | Smith      |                       |                  | Jawad A Qureshi MD PA DBA Retina Center of Texas             | Southlake TX US                          | Coordinator                                             |                                                                                            |
| Victoria E.                       | Cowart     |                       |                  | Jawad A Qureshi MD PA DBA Retina Center of Texas             | Southlake TX US                          | Coordinator                                             |                                                                                            |
| Annette M.                        | Carey      |                       | COA              | Southeast Eye Institute, P.A. dba Eye Associates of Pinellas | PINELLAS PARK FL US                      | Photographer                                            |                                                                                            |
| Bronson                           | Oudshoff   |                       | CCRC             | Southeast Eye Institute, P.A. dba Eye Associates of Pinellas | PINELLAS PARK FL US                      | Coordinator                                             |                                                                                            |
| Christina                         | Glover     |                       |                  | Southeast Eye Institute, P.A. dba Eye Associates of Pinellas | PINELLAS PARK FL US                      | Photographer                                            |                                                                                            |
| Jason M.                          | Handza     |                       | DO               | Southeast Eye Institute, P.A. dba Eye Associates of Pinellas | PINELLAS PARK FL US                      | Investigator                                            |                                                                                            |
| Allen                             | Chiang     |                       | MD               | Mid Atlantic Retina                                          | PHILADELPHIA PA US                       | Investigator                                            |                                                                                            |
| Brianna                           | Kenney     |                       |                  | Mid Atlantic Retina                                          | PHILADELPHIA PA US                       | Coordinator                                             |                                                                                            |
| Carl                              | Regillo    |                       | MD               | Mid Atlantic Retina                                          | PHILADELPHIA PA US                       | Investigator                                            |                                                                                            |
| Dylon                             | Williams   |                       |                  | Mid Atlantic Retina                                          | PHILADELPHIA PA US                       | Coordinator                                             |                                                                                            |
| Elaine                            | Gonzales   |                       |                  | Mid Atlantic Retina                                          | PHILADELPHIA PA US                       | Photographer                                            |                                                                                            |
| Hannah                            | Benfield   |                       | COA              | Mid Atlantic Retina                                          | PHILADELPHIA PA US                       | Coordinator                                             |                                                                                            |
| Jason                             | Hsu        |                       | MD               | Mid Atlantic Retina                                          | PHILADELPHIA PA US                       | Investigator                                            |                                                                                            |
| Lisa                              | Grande     |                       |                  | Mid Atlantic Retina                                          | PHILADELPHIA PA US                       | VA Tester                                               |                                                                                            |
| Megan                             | Huntzberry |                       |                  | Mid Atlantic Retina                                          | PHILADELPHIA PA US                       | VA Tester                                               |                                                                                            |
| Michelle                          | Millard    |                       |                  | Mid Atlantic Retina                                          | PHILADELPHIA PA US                       | VA Tester                                               |                                                                                            |
| Ana Maria                         | Merchan    |                       |                  | Illinois Retina Associates SC – Oak Park Site                | Oak Park IL US                           | Coordinator                                             |                                                                                            |
| Annie                             | Hernandez  |                       |                  | Illinois Retina Associates SC – Oak Park Site                | Oak Park IL US                           | VA Tester                                               |                                                                                            |

Supplemental Online Content: Nonauthor Collaborators

\*First name, last name, and suffix (if applicable) are required and will appear in PubMed.

| *First Name and Middle Initial(s) | *Last Name | *Suffix (eg, Jr, III) | Academic Degrees | Institution                                                   | Location (city, state/province, country) | Role or Contribution, eg, chair, principal investigator | Group (if more than 1 Group listed in the byline) and/or Subgroup (eg, Steering Committee) |
|-----------------------------------|------------|-----------------------|------------------|---------------------------------------------------------------|------------------------------------------|---------------------------------------------------------|--------------------------------------------------------------------------------------------|
| Cristal                           | Cardoza    |                       |                  | Illinois Retina Associates SC – Oak Park Site                 | Oak Park IL US                           | Photographer                                            |                                                                                            |
| Karen                             | Parque     |                       |                  | Illinois Retina Associates SC – Oak Park Site                 | Oak Park IL US                           | Photographer                                            |                                                                                            |
| Mathew W.                         | MacCumber  |                       | MD, PhD          | Illinois Retina Associates SC – Oak Park Site                 | Oak Park IL US                           | Investigator                                            |                                                                                            |
| Pauline                           | Merrill    |                       | MD               | Illinois Retina Associates SC – Oak Park Site                 | Oak Park IL US                           | Investigator                                            |                                                                                            |
| Sara E.                           | Montgomery |                       |                  | Illinois Retina Associates SC – Oak Park Site                 | Oak Park IL US                           | Coordinator                                             |                                                                                            |
| Cathy                             | Huertas    |                       |                  | Ophthalmic Partners of Florida, PA dba Central Florida Retina | Orlando FL US                            | VA Tester                                               |                                                                                            |
| Eric                              | Feinstein  |                       | MD               | Ophthalmic Partners of Florida, PA dba Central Florida Retina | Orlando FL US                            | Investigator                                            |                                                                                            |
| Ginny G.                          | Bell       |                       | COA              | Ophthalmic Partners of Florida, PA dba Central Florida Retina | Orlando FL US                            | Coordinator                                             |                                                                                            |
| Gokul                             | Kumar      |                       | MD               | Ophthalmic Partners of Florida, PA dba Central Florida Retina | Orlando FL US                            | Investigator                                            |                                                                                            |
| John                              | Fulgencio  |                       |                  | Ophthalmic Partners of Florida, PA dba Central Florida Retina | Orlando FL US                            | Photographer                                            |                                                                                            |
| John                              | Olson      |                       | MD               | Ophthalmic Partners of Florida, PA dba Central Florida Retina | Orlando FL US                            | Investigator                                            |                                                                                            |
| Sarah                             | Daffron    |                       |                  | Ophthalmic Partners of Florida, PA dba Central Florida Retina | Orlando FL US                            | Photographer                                            |                                                                                            |
| Sonia                             | Philibin   |                       |                  | Ophthalmic Partners of Florida, PA dba Central Florida Retina | Orlando FL US                            | VA Tester                                               |                                                                                            |
| Ahmad B.                          | Tarabishy  |                       | MD               | SEASHORE RETINA LLC DBA Retina Specialists of Tampa           | Wesley Chapel FL US                      | Investigator                                            |                                                                                            |
| Dana                              | Blair      |                       | COA              | SEASHORE RETINA LLC DBA Retina Specialists of Tampa           | Wesley Chapel FL US                      | VA Tester                                               |                                                                                            |

Supplemental Online Content: Nonauthor Collaborators

\*First name, last name, and suffix (if applicable) are required and will appear in PubMed.

| *First Name and Middle Initial(s) | *Last Name  | *Suffix (eg, Jr, III) | Academic Degrees | Institution                                                     | Location (city, state/province, country) | Role or Contribution, eg, chair, principal investigator | Group (if more than 1 Group listed in the byline) and/or Subgroup (eg, Steering Committee) |
|-----------------------------------|-------------|-----------------------|------------------|-----------------------------------------------------------------|------------------------------------------|---------------------------------------------------------|--------------------------------------------------------------------------------------------|
| Evan N.                           | Dunn        |                       | MD               | SEASHORE RETINA LLC DBA Retina Specialists of Tampa             | Wesley Chapel FL US                      | Investigator                                            |                                                                                            |
| Jessica                           | Meyers      |                       |                  | SEASHORE RETINA LLC DBA Retina Specialists of Tampa             | Wesley Chapel FL US                      | Photographer                                            |                                                                                            |
| Marcus                            | Goff        |                       |                  | SEASHORE RETINA LLC DBA Retina Specialists of Tampa             | Wesley Chapel FL US                      | Coordinator                                             |                                                                                            |
| Megan                             | Spear       |                       |                  | SEASHORE RETINA LLC DBA Retina Specialists of Tampa             | Wesley Chapel FL US                      | VA Tester                                               |                                                                                            |
| Steve                             | Morris      |                       | BBA,COA          | SEASHORE RETINA LLC DBA Retina Specialists of Tampa             | Wesley Chapel FL US                      | Coordinator                                             |                                                                                            |
| Alamira B                         | Summerville |                       |                  | Florida Retina Institute, James A. Staman, MD, PA- Jacksonville | Jacksonville FL US                       | Photographer                                            |                                                                                            |
| Aubrey J                          | Hoekzema    |                       | BS               | Florida Retina Institute, James A. Staman, MD, PA- Jacksonville | Jacksonville FL US                       | VA Tester                                               |                                                                                            |
| Becky                             | Huynh       |                       |                  | Florida Retina Institute, James A. Staman, MD, PA- Jacksonville | Jacksonville FL US                       | VA Tester                                               |                                                                                            |
| Benjamin J.                       | Thomas      |                       | MD               | Florida Retina Institute, James A. Staman, MD, PA- Jacksonville | Jacksonville FL US                       | Investigator                                            |                                                                                            |
| Heavenly S                        | Carter      |                       |                  | Florida Retina Institute, James A. Staman, MD, PA- Jacksonville | Jacksonville FL US                       | Photographer                                            |                                                                                            |
| James A.                          | Staman      |                       | MD               | Florida Retina Institute, James A. Staman, MD, PA- Jacksonville | Jacksonville FL US                       | Investigator                                            |                                                                                            |
| Jonathan A.                       | Staman      |                       | MD               | Florida Retina Institute, James A. Staman, MD, PA- Jacksonville | Jacksonville FL US                       | Investigator                                            |                                                                                            |
| Karen D.                          | Yesensky    |                       |                  | Florida Retina Institute, James A. Staman, MD, PA- Jacksonville | Jacksonville FL US                       | Coordinator                                             |                                                                                            |
| Massiel                           | Montalvo    |                       |                  | Florida Retina Institute, James A. Staman, MD, PA- Jacksonville | Jacksonville FL US                       | Coordinator                                             |                                                                                            |
| Maxsonne                          | Charleus    |                       |                  | Florida Retina Institute, James A. Staman, MD, PA- Jacksonville | Jacksonville FL US                       | Photographer                                            |                                                                                            |

## Supplemental Online Content: Nonauthor Collaborators

\*First name, last name, and suffix (if applicable) are required and will appear in PubMed.

| *First Name and Middle Initial(s) | *Last Name  | *Suffix (eg, Jr, III) | Academic Degrees | Institution                                                     | Location (city, state/province, country) | Role or Contribution, eg, chair, principal investigator | Group (if more than 1 Group listed in the byline) and/or Subgroup (eg, Steering Committee) |
|-----------------------------------|-------------|-----------------------|------------------|-----------------------------------------------------------------|------------------------------------------|---------------------------------------------------------|--------------------------------------------------------------------------------------------|
| Sovanny Brenda                    | Pheng       |                       |                  | Florida Retina Institute, James A. Staman, MD, PA- Jacksonville | Jacksonville FL US                       | Photographer                                            |                                                                                            |
| Steven                            | Epperson    |                       |                  | Florida Retina Institute, James A. Staman, MD, PA- Jacksonville | Jacksonville FL US                       | Photographer                                            |                                                                                            |
| Tiffany                           | Maximin     |                       |                  | Florida Retina Institute, James A. Staman, MD, PA- Jacksonville | Jacksonville FL US                       | Photographer                                            |                                                                                            |
| Allan A.                          | Hunter      | III                   | MD               | Cascade Medical Research Institute, LLC                         | Springfield OR US                        | Investigator                                            |                                                                                            |
| Roy W.                            | Beck        |                       | MD, PhD          | Jaeb Center for Health Research                                 | Tampa, FL US                             | Jaeb Center for Health Research President               | Executive Committee 2002 - present                                                         |
| Alyssa                            | Baptista    |                       | BS               | Jaeb Center for Health Research                                 | Tampa, FL US                             |                                                         |                                                                                            |
| Wesley T.                         | Beaulieu    |                       | PhD              | Jaeb Center for Health Research                                 | Tampa, FL US                             |                                                         |                                                                                            |
| Claire T.                         | Calhoun     |                       | MS               | Jaeb Center for Health Research                                 | Tampa, FL US                             |                                                         |                                                                                            |
| Sharon R.                         | Constantine |                       | BS               | Jaeb Center for Health Research                                 | Tampa, FL US                             |                                                         |                                                                                            |
| Isabella                          | Correia     |                       | BS               | Jaeb Center for Health Research                                 | Tampa, FL US                             |                                                         |                                                                                            |
| Brian B.                          | Dale        |                       |                  | Jaeb Center for Health Research                                 | Tampa, FL US                             |                                                         |                                                                                            |
| Simone S.                         | Dupre       |                       | BS               | Jaeb Center for Health Research                                 | Tampa, FL US                             |                                                         |                                                                                            |
| Crystal A.                        | Franklin    |                       | MPH              | Jaeb Center for Health Research                                 | Tampa, FL US                             |                                                         |                                                                                            |
| Sandra                            | Galusic     |                       | MSPH             | Jaeb Center for Health Research                                 | Tampa, FL US                             |                                                         |                                                                                            |
| Meagan                            | Huggins     |                       | BA               | Jaeb Center for Health Research                                 | Tampa, FL US                             |                                                         |                                                                                            |

Supplemental Online Content: Nonauthor Collaborators

\*First name, last name, and suffix (if applicable) are required and will appear in PubMed.

| *First Name and Middle Initial(s) | *Last Name | *Suffix (eg, Jr, III) | Academic Degrees | Institution                        | Location (city, state/province, country) | Role or Contribution, eg, chair, principal investigator | Group (if more than 1 Group listed in the byline) and/or Subgroup (eg, Steering Committee) |
|-----------------------------------|------------|-----------------------|------------------|------------------------------------|------------------------------------------|---------------------------------------------------------|--------------------------------------------------------------------------------------------|
| Brenda L.                         | Hunter     |                       | BS               | Jaeb Center for Health Research    | Tampa, FL US                             |                                                         |                                                                                            |
| Paula A.                          | Johnson    |                       | MPH              | Jaeb Center for Health Research    | Tampa, FL US                             |                                                         |                                                                                            |
| Kristin                           | Josic      |                       | PhD              | Jaeb Center for Health Research    | Tampa, FL US                             |                                                         |                                                                                            |
| Brittany                          | Kelly      |                       | MSHS             | Jaeb Center for Health Research    | Tampa, FL US                             |                                                         |                                                                                            |
| Maureen G.                        | Maguire    |                       | PhD              | Jaeb Center for Health Research    | Tampa, FL US                             |                                                         |                                                                                            |
| Britney                           | Meadows    |                       | BS               | Jaeb Center for Health Research    | Tampa, FL US                             |                                                         |                                                                                            |
| Michele                           | Melia      |                       | ScM              | Jaeb Center for Health Research    | Tampa, FL US                             |                                                         |                                                                                            |
| Carin M.                          | Preston    |                       | MPH              | Jaeb Center for Health Research    | Tampa, FL US                             |                                                         |                                                                                            |
| Cynthia R.                        | Stockdale  |                       | MSPH             | Jaeb Center for Health Research    | Tampa, FL US                             |                                                         |                                                                                            |
| Alice                             | Zokruah    |                       | BS               | Jaeb Center for Health Research    | Tampa, FL US                             |                                                         |                                                                                            |
| Sangeeta                          | Bhargava   |                       | PhD              | National Eye Institute             | Bethesda, MD US                          |                                                         | Executive Committee 2016 - present                                                         |
| Andrew J.                         | Barkmeier  |                       | MD               | Mayo Clinic                        | Rochester, MN US                         |                                                         | Executive Committee 2022 - present; Steering Committee 2022 - present                      |
| Darrell                           | Baskin     |                       | MD               | Retinal Consultants of San Antonio | San Antonio, TX US                       |                                                         | Executive Committee 2021 - present; Steering Committee 2022-present                        |

## Supplemental Online Content: Nonauthor Collaborators

\*First name, last name, and suffix (if applicable) are required and will appear in PubMed.

| *First Name and Middle Initial(s) | *Last Name | *Suffix (eg, Jr, III) | Academic Degrees | Institution                                                           | Location (city, state/province, country) | Role or Contribution, eg, chair, principal investigator | Group (if more than 1 Group listed in the byline) and/or Subgroup (eg, Steering Committee) |
|-----------------------------------|------------|-----------------------|------------------|-----------------------------------------------------------------------|------------------------------------------|---------------------------------------------------------|--------------------------------------------------------------------------------------------|
| Barbra                            | Blodi      |                       | MD               | University of Wisconsin-Madison, Dept of Ophthalmology/Retina Service | Madison, WI US                           |                                                         | Executive Committee 2015 - present                                                         |
| Emily                             | Chew       |                       | MD               | National Eye Institute                                                | Bethesda, MD US                          |                                                         | Executive Committee 2022 - present; Steering Committee 2022 - present                      |
| Frederick L.                      | Ferris     | III                   | MD               | Ophthalmic Research Consultants                                       | Waxhaw, NC US                            |                                                         | Executive Committee 2002 - present; Steering Committee 2022 - present                      |
| Sharon D.                         | Solomon    |                       | MD               | Wilmer Ophthalmological Institute                                     | Baltimore, MD US                         |                                                         | Executive Committee 2020 - present                                                         |
| Glenn J.                          | Jaffe      |                       | MD               | Duke Eye Center                                                       | Durham, NC US                            |                                                         | Executive Committee 2012 - present                                                         |
| Neil M.                           | Bressler   |                       | MD               | Wilmer Ophthalmological Institute                                     | Baltimore, MD US                         |                                                         | Executive Committee 2006 - 2019; Chair 2006 - 2012                                         |
| Brandon                           | Lujan      |                       | MD               | Casey Reading Center                                                  | Portland, OR US                          |                                                         | Executive Committee 2017 - 2021                                                            |
| Gary                              | Abrams     |                       | MD               |                                                                       |                                          |                                                         | Data and Safety Monitoring Committee                                                       |
| Deborah R.                        | Barnbaum   |                       | PhD              |                                                                       |                                          |                                                         | Data and Safety Monitoring Committee                                                       |
| Harry                             | Flynn      |                       | MD               |                                                                       |                                          |                                                         | Data and Safety Monitoring Committee                                                       |

## Supplemental Online Content: Nonauthor Collaborators

\*First name, last name, and suffix (if applicable) are required and will appear in PubMed.

| <b>*First Name and Middle Initial(s)</b> | <b>*Last Name</b> | <b>*Suffix (eg, Jr, III)</b> | Academic Degrees | Institution | Location (city, state/province, country) | Role or Contribution, eg, chair, principal investigator | Group (if more than 1 Group listed in the byline) and/or Subgroup (eg, Steering Committee) |
|------------------------------------------|-------------------|------------------------------|------------------|-------------|------------------------------------------|---------------------------------------------------------|--------------------------------------------------------------------------------------------|
| Kyle D.                                  | Rudser            |                              | PhD              |             |                                          |                                                         | Data and Safety Monitoring Committee                                                       |
| Paul                                     | Sternberg         | Jr.                          | MD               |             |                                          |                                                         | Data and Safety Monitoring Committee                                                       |
| Ruth S.                                  | Weinstock         |                              | MD, PhD          |             |                                          |                                                         | Data and Safety Monitoring Committee                                                       |
| Stephen                                  | Wisniewski        |                              | PhD              |             |                                          |                                                         | Data and Safety Monitoring Committee                                                       |
