# Supplementary material
Source: PubMed Central journal article supplement (PMC9896372)
Supplement: jamaophthalmol-e226142-s003.pdf [file jamaophthalmol-e226142-s003.pdf]

## Data Sharing Statement

Hutton. Cost-effectiveness of Aflibercept Monotherapy vs Bevacizumab First Followed by Aflibercept If Needed for Diabetic Macular Edema. *JAMA Ophthalmol.* Published February 02, 2023. doi:10.1001/jamaophthalmol.2022.6142

### Data

**Data available:** Yes

**Data types:** Deidentified participant data

**How to access data:** [www.drcr.net](http://www.drcr.net) one year after publication

**When available:** beginning date: 01-24-2024

### Supporting Documents

**Document types:** None

### Additional Information

**Who can access the data:** anyone

**Types of analyses:** any

**Mechanisms of data availability:** without support

**Any additional restrictions:** none
